# Supplementary material for: A CRISPR/Cas9 toolkit for multiplex genome editing in plants
Source: Springer Nature journal article supplement (doi:10.1186/s12870-014-0327-y), 2014-11-28
Supplement: 12870_2014_327_MOESM3_ESM.pdf [file 12870_2014_327_MOESM3_ESM.pdf]

## Additional file 3

### Methods S2

#### Golden Gate cloning method for the assembly of one or two gRNAs

##### Table of contents

|                                                                          |    |
|--------------------------------------------------------------------------|----|
| Simplified protocol .....                                                | 2  |
| Table S2-1 Nomenclature of inserts/oligos and PCR products/primers ..... | 3  |
| Sequence of maize codon-optimized Cas9 (zCas9) .....                     | 4  |
| Sequence of SpR-gRNA-Scaffold.....                                       | 5  |
| Sequence of U6-26p-driven gRNA expression cassette without target .....  | 6  |
| Sequence of DT1T2-PCR with Targets 1 and 2 for dicots.....               | 7  |
| Sequence of one gRNA expression cassette for dicots.....                 | 8  |
| Sequence of two gRNA expression cassettes for dicots.....                | 9  |
| Sequence of OsU3p-driven gRNA expression cassette without target .....   | 10 |
| Sequence of MT1T2-PCR with Targets 1 and 2 for monocots .....            | 11 |
| Sequence of one gRNA expression cassette for monocots .....              | 12 |
| Sequence of two gRNA expression cassettes for monocots.....              | 13 |

## Simplified protocol

1. Manually search for 23-bp target sites (5'-N<sub>20</sub>NGG-3') within exons of genomic DNA sequences of genes of interest, and then evaluate target specificities on the website of potential off-target finder (<http://www.rgenome.net/cas-offfinder/>). Users can also search for target sites on the website of genome-wide prediction of plant CRISPR/Cas9 target sites (<http://www.genome.arizona.edu/crispr/CRISPRsearch.html>).
2. Design primers:
  - a) Find names of inserts/oligos (for one gRNA ) or PCR fragments/primers (for two gRNAs) according to plant species (monocots or dicots) and gRNA numbers in Table S2-1.
  - b) Find the sequences of the oligos/primers according to the names.
  - c) Replace 19-nt N in the forward primers with your 19-nt target sequences in front of PAM (NGG), and 19-nt N in the reverse primers with reverse complement sequences of your 19-nt target sequences in front of PAM (NGG).
3. Carry out PCR reactions according to information provided under the sequences of the PCR fragments. As an example, the reaction mixture and reaction conditions are as follows for construction of pHSE401-2gR-CHLI:

| Component                         | Volume | Cycling conditions           |
|-----------------------------------|--------|------------------------------|
| 10× KOD plus Buffer               | 5 µl   |                              |
| MgSO <sub>4</sub> (25mM)          | 3 µl   |                              |
| dNTPs (2mM, Toyobo)               | 4 µl   |                              |
| KOD plus (Toyobo)                 | 1 µl   |                              |
| pCBC-DT1T2 (diluted to 200 times) | 1 µl   | 1. One cycle: 94 °C, 2 min.  |
| DT1-BsF (20 µM)                   | 1 µl   | 2. 30 cycles: 94 °C, 15 sec; |
| DT1-F0 (1 µM)                     | 1 µl   | 60 °C, 30 sec; 68 °C, 1 min. |
| DT2-RO (1 µM)                     | 1 µl   | 3. One cycle: 68 °C, 5 min   |
| DT2-BsR (20 µM)                   | 1 µl   |                              |
| ddH <sub>2</sub> O                | 32 µl  |                              |
| Total volume                      | 50 µl  |                              |

4. Set up Golden Gate reactions as follows:

| Component                           | Volume | Reaction conditions            |
|-------------------------------------|--------|--------------------------------|
| Purified PCR fragments (~100 ng/µl) | 2 µl   | 5 hours at 37°C                |
| pHSE401 or others (~100 ng/µl)      | 2 µl   | 5 min at 50°C                  |
| 10× T4 DNA Ligase Buffer (NEB)      | 1.5 µl | 10 min at 80°C                 |
| 10× BSA                             | 1.5 µl |                                |
| <i>Bsa</i> I (NEB)                  | 1 µl   |                                |
| T4 DNA Ligase (HC, NEB)             | 1 µl   | NOTE: It is essential to use a |
| ddH <sub>2</sub> O                  | 6 µl   | High Concentration (HC) Ligase |
| Total volume                        | 15 µl  | (2 million units/ml, NEB)      |

5. Transform *E.coli* competent cells with 5 µl of reaction mixture, and select positive clones on kanamycin LB agar plates.
6. Identify correct clones by colony PCR and verify them by sequencing.

**Table S2-1 Nomenclature of inserts/oligos and PCR products/primers**

| <b>For dicots</b>     |                                  |                 |
|-----------------------|----------------------------------|-----------------|
| Insert or PCR product | Oligos or Primers                | Number of gRNAs |
| 01-insert             | Oligo-01-F<br>Oligo-R            | 1               |
| DT1T2-PCR             | DT1-BsF/DT1-F0<br>DT2-R0/DT2-BsR | 2               |
| <b>For monocots</b>   |                                  |                 |
| Insert or PCR product | Oligos or Primers                | Number of gRNAs |
| 11-insert             | Oligo-11-F<br>Oligo-R            | 1               |
| MT1T2-PCR             | MT1-BsF/MT1-F0<br>MT2-R0/MT2-BsR | 2               |

**Notes:**

1. Dilute the F0/R0 primers to 20 times of the F/R primers.

## Sequence of maize codon-optimized Cas9 (zCas9)

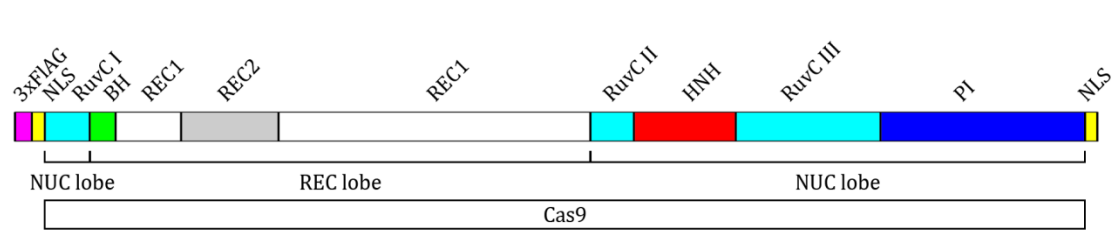

ATG GATTACAAGGACCACGACGGGGATTACAAGGACCACGACATTGATTACAAGGATGATGACAAGATGGCTCCGAAGAAGAAGAGGAAGGTTGGC  
 ATCCACGGGGTCCAGCTGCTGACAAGAAGTACTCGATCGGCCCTCGATATTGGGACTAACTCTGTTGGCTGGGCCGTGATCACCGACGAGTACAAGGTGC  
 CCTCAAAGAAGTTCAAGGTCCTGGGCAACCCGATCGGCATTCCATCAAGAAGAATCTATTGGCGCTCTCTGTTCCGACAGCGGGCAGACGGGCTGAGG  
 CTACGCGGCTCAAGCGCACCGCCCGCAGGCGGTACACGCGCAGGAAGAATCGCATCTGTACTCTGACGAGATTTTCTCCAACGAGATGGCGAAGGTTG  
 AC GATTCTTTTCCACAGGCTGGAGGAGTCTTCTCTGAGGAGGATAAGAAGCAGCAGCGGCATCCAATCTTCGGCAACATTGTGACGAGGTTGC  
 CTACCAGAGAAGTACCTACGATCTACCATCTCGGGAAGAAGCTCTGGACTCCACAGATAAAGCGGACCTCCGCTGATCTACCTCGCTGCGCCACA  
 TGATTAAGTTCAGGGGCCATTTCTGATCGAGGGGATCTCAACCCGACAATAGCGATGTTGACAAGCTGTTACATCCAGCTCGTGACAGCTACAACCA  
 GCTCTTCGAGGAGAACCCATTAATGCGTCAAGGCGTACGCGAAGGCTATCTGTCGCTAGGCTCTCGAAGTCTCGGCGCTCGAGAACCTGATCGCC  
 CAGCTCGCGGGGAGAGAAGAAGGCGCTGTTCCGGAAATCTATTGCGCTCAGCCTGGGGCTCACGCCAACTTCAAGTCAATTTCGATCTCGTGTGAG  
 GTGCCAAGCTGCAGCTCTCCAAGGACACATACGACGATGACCTGGATAAACCCTCGGCCAGATCGCGGATCAGTACGCGGACTCTGCTCGGTGCCA  
 AGAATCTGTCGACGCCATCTCTGCTGATATTCTCAGGGTGAACCCGAGATTACGAAGGCTCCGCTCTCAGCTCCATGATCAAGCGCTACGACGAG  
 CACCATCAGGATCTGACCTCTGAAGGCGCTGTCAGGCGACGCTCCCGAGAAGTACAAGGAGATCTTCTCGATCAGTCAAGAAGCGCTACGCTG  
 GGTACATTGACGGCGGGCCTCTCAGGAGGAGTTTACAAGTTCATCAAGCCGATTCTGGAGAAGATGGACGGCACGGAGGAGCTGTGTGAAGCTC  
 AATCCGAGGACTCTGAGGAAGCAGCGGACATTGATAACCGCAGCTCCGGAACCCAGATCCATCTCGGGAGCTGCACGCTGAGGAGCGAG  
 GAGGACTTCTACCTTTCTCAAGGATAACCGGAGAAGATCGAGAAGATTCTGACTTTCAGGATCCCGTACTACGTCGGCCACTCGTAGGGCAACTC  
 CCGCTTCGCTTGATGACCCGCAAGTCAAGGAGACGATCAGCCGTTGAACTTCGAGGAGGTGGTGACAAGGGCGCTAGCGCTCAGTCTGTTACATGA  
 GAGGATGACGAATTTGACAAGAACCTGCCAATGAGAAGGTCTCCCTAAGCACTCGCTCTGTACGAGTACTTCAAGTCTACAACGAGCTGACTAAG  
 GTGAAGTATGTGACGAGGCGATGAGGAAGCGGCTTTCTGCTGTTGGGAGCAGAAGAAGGCCATCGTGGACCTCTGTTCAAGACCAACCGGAAGGT  
 CACGGTTAAGCAGCTCAAGGAGGACTACTTCAAGAAGATTGAGTGTTCGATTCCGGTCGAGATCTCTGGCGTTGAGGACCGCTTCAACGCCTCCCTGGGG  
 ACCTACCAGATCTCTGAAGATCATTAAAGGATAAGGACTTCTGACAAACGAGGAGAAAGGATATCTCGAGGACATTGTGCTGACACTCACTCTGTT  
 CGAGGACCGGGAGATGATCAGGAGCGCTGAAGACTTACGCCATCTCTCGATGACAAGGTATGAAAGCAGCTCAAGAGGAGGAGGTACACCGGCT  
 GGGGGAGGCTGAGCAGGAAGCTCATCAACGGCATTCCGGACAAGCAGTCCGGGAAGACGATCTCGACTTCTGAAGAGCGATGGCTTCGCGAACCCG  
 AATTTTCATGACGCTGATTACGATGACAGCTCACATTCAAGGAGGATATCCAGAAGGCTCAGGTGAGCGGCCAGGGGGACTCGCTGACGAGCATATCG  
 CGAACCTCGCTGGCTCGCCAGCTATCAAGAAGGGGATTCTGCAGACCCTGAAGGTTGTGGACGAGCTGGTGAAGGTATGGGACGGCACAAGCTGAG  
 AACATCGTATTGAGATGGCCCGGAGAATCAGACCACGAGAAGGGCCAGAAGAACTCACGCGAGAGGATGAAGAGGATCGAGGAGGGCATTAAGG  
 AGCTGGGGTCCAGATCTCAAGGAGCACCCGGTGGAGAACCGCAGCTGCAGAATGAGAAGCTCTACCTGTACTACCTCCAGAATGGCCGCGATATGTA  
 TGTGGACCAAGGAGCTGGATATAACAGGCTCAGCGATTACGACGCTCGATCATATCGTTCCACAGTCACTTCTGAAGGATGACTCCATTGACAACAAGGTC  
 TCACCAGGTCGGACAAGAACCAGGGAAGTCTGATAATGTTCTCTCAGAGGAGGCTGTTAAGAAGATGAAGAAGTACTGGCGCCAGCTCTGATGACCA  
 AGCTGATCAGCAGCGGAAGTTCGATAAACCACAAGGCTGAGAGGGGGCGGCTCTGAGCTGGACAAGGGCGGCTTTCATCAAGAGGCGAGCTGGTC  
 GAGACACGGCAGATCACTAAGCACGTTGCGCAGATTCTCGACTACCGATGAACACTAAGTACGATGAGAATGACAAGCTGATCCGCGAGGTGAAGGTC  
 ATCACCTGAAGTCAAAGCTCGTCCGACTTCAGGAAGGATTTCCAGTTCTACAAGGTTCCGGGAGATCAACAATTACCACATGCCATGACCGGTACCT  
 GAACCGGTTGGTCGACAGCTCTGATCAAGAAGTACCCAAAGCTCGAGAGCGAGTTCGTGTACGGGACTACAAGGTTTACGATGTGAGGAAGATGAT  
 CGCCAAGTCGGAGCAGGAGATTGGCAAGGCTACCGCCAAGTACTTCTACTCTAACATTATGAATTTCTTCAAGACAGAGATCACTCTGCGCAATGGCG  
 AGATCCGGAAGCGCCCTCATCGAGACGAACGCGGAGACGGGGAGATCGTGTGGACAAGGGCAGGATTTCGCGACCGTCAGGAAGGTTCTCTCC  
 ATGCCACAAGTGAATATCGTCAAGAAGACAGAGGTCCAGACTGGCGGGTCTCTAAGGAGTCAATTCTGCCTAAGCGGAACAGGCAAGCTATCGCC  
 GCAAGAAGGACTGGATCCGAAGAAGTACGGCGGTTTCGACAGCCCACTGTGGCTACTCGGTCCTGTTGTGGCGAAGGTTGAGAAGGGCAAGTCC  
 AAGAAGCTCAAGAGCTGAAGGAGCTGCTGGGGATCAGGATTATGAGGCGCTCCAGCTTCGAGAAGAACCAGTATCTCTGAGGCGGAAGGGCTA  
 CAAGGAGGTGAAGAAGGACCTGATCATTAAAGTCCCAAGTACTCACTCTTCGAGCTGGAGAACGGCAGGAAGCGGATGCTGGCTCCCGTGGCGAGCT  
 GCAGAAGGGGAACGAGCTGCTCTGCGCTCAAGTATGTGAATCTCTACTTCCGCTCCACTACGAGAAGCTCAAGGGCAGCCCGAGGACAACGA  
 GCAGAAGCAGCTGTTCTGTCGAGCAGCACAAGCATTACCTCGACGAGATCATTGAGCAGATTTCGAGTTCCTCAAGCGCGTATCTGGCCGACGCGAAT  
 CTGGATAAGGTTCTCTCCGCTACAACAAGCACCGGACAAGCCAATCAGGGAGCAGGCTGAGAATATCATTCATCTTCCACCTGACGAACCTCGGCC  
 CCCCTGCTGTTTCAAGTACTTCGACACAATATCGATCGCAAGGATACACAAGCACTAAGGAGGTTCTGGACGGACCTCATCCACAGTCAAGTAC  
 GGCTCTACGAGACGCGCATCGACTGTCTCAGCTCGGGGGCAGCAAGCGGCCAGCGGCGACGAAGAAGCGGGGCGAGGCGAAGAAGAAGAAGTGA

## Sequence of SpR-gRNA-Scaffold

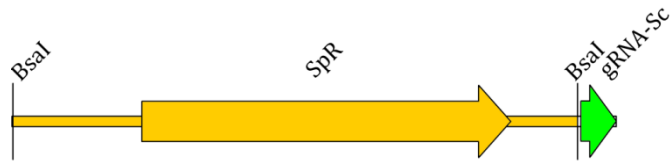

(**Bsal**)-(SpR)-(Bsal)-(gRNA-Sc)

**GAGACC**AACCCAGTGGACATAAGCCTGTTTCGGTTCGTAAGCTGTAATGCAAGTAGCGTATGCGCT  
CACGCAACTGGTCCAGAACCTTGACCGAACGCAGCGGTGGTAACGGCGCAGTGGCGGTTTTTCATGGCTTG  
TTATGACTGTTTTTTGGGGTACAGTCTATGCCTCGGGCATCCAAGCAGCAAGCGCGTTACGCCGTGGGTCG  
ATGTTTGATGTTATGGAGCAGCAACGATGTTACGCAGCAGGGCAGTCGCCCTAAAAACAAAGTTAAACATC**AT**  
**GGGGGAAGCGGTGATCGCCGAAGTATCGACTCAACTATCAGAGGTAGTTGGCGTCATCGAGCGCCATCTCG**  
**AACCGACGTTGCTGGCCGTACATTTGTACGGCTCCGCAGTGGATGGCGGCCTGAAGCCACACAGTGATATT**  
**GATTTGCTGGTTACGGTGACCGTAAGGCTTGATGAAACAACCGCGCGAGCTTTGATCAACGACCTTTTGGGA**  
**AACTTCGGCTTCCCTGGAGAGAGCGAGATTCTCCGCGCTGTAGAAGTCACCATTGTTGTGCACGACGACAT**  
**CATTCGTTGGCGTTATCCAGCTAAGCGCGAACTGCAATTTGGAGAATGGCAGCGCAATGACATTCTTGCAGG**  
**TATCTTCGAGCCAGCCACGATCGACATTGATCTGGCTATCTTGCTGACAAAAGCAAGAGAACATAGCGTTGC**  
**CTTGGTAGGTCCAGCGGCGGAGGAACCTTTGATCCGGTTCCTGAACAGGATCTATTTGAGGCGCTAAATGA**  
**AACCTAACGCTATGGAACCTCGCCGCCGACTGGGCTGGCGATGAGCGAAATGTAGTGCTTACGTTGTCCCG**  
**CATTTGGTACAGCGCAGTAACCGGCAAAATCGCGCCGAAGGATGTCGCTGCCGACTGGGCAATGGAGCGC**  
**CTGCCGCCAGTATCAGCCGTCATACTTGAAGCTAGACAGGCTTATCTTGGACAAGAAGAAGATCGCTTG**  
**GCCTCGCGCGCAGATCAGTTGGAAGAATTTGTCCACTACGTGAAAGGCGAGATACCAAGGTAGTCGGCAA**  
**ATAATGTCTAGCTAGAAATTCGTTCAAGCCGACCGCTTCGCGGCGCGGCTTAACTCAAGCGTTAGATGCA**  
**CTAAGCACATAATTGCTCACAGCCAACTATCAGGTCAAGTCTGCTTTTATTATTTTAAAGCGTGCATAATAAG**  
**CCGGTCTCGTTTTAGAGCTAGAAATAGCAAGTTAAATAAGGCTAGTCCGTTATCAACTTGAAAA**  
**AGTGGCACCGAGTCGGTGC**

### Notes:

1. SpR, spectinomycin-resistance gene; gRNA-Sc, gRNA scaffold.
2. Enlarged and boxed letters indicate *Bsal* sites.

**Sequence of U6-26p-driven gRNA expression cassette without target**

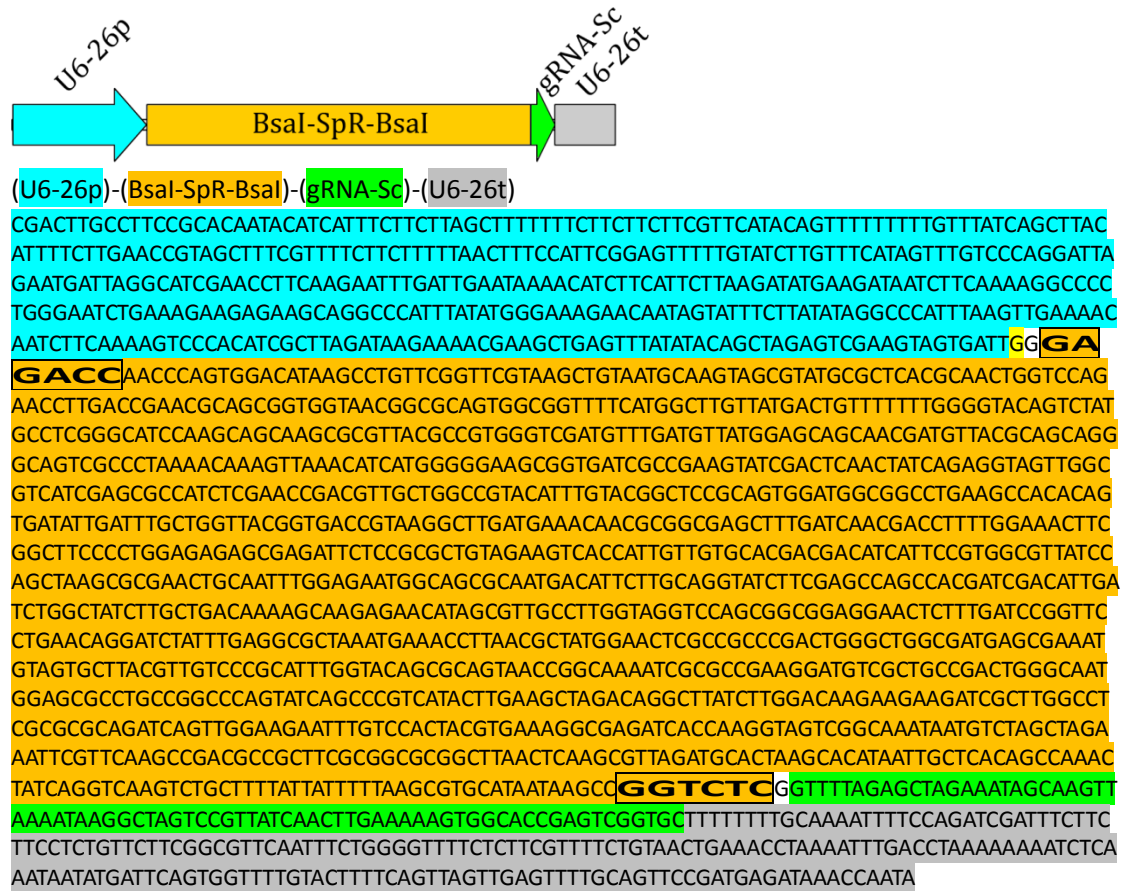

**Notes:**

1. SpR, spectinomycin-resistance gene; gRNA-Sc, gRNA scaffold.
2. Enlarged and boxed letters indicate *Bsal* sites.

**Sequence of DT1T2-PCR with Targets 1 and 2 for dicots**

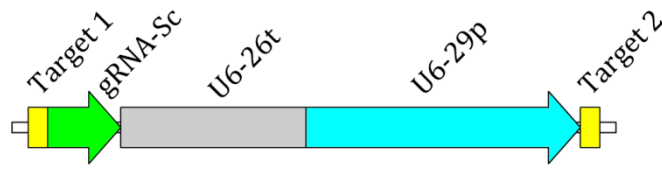

**(Target-1)-(gRNA-Sc)-(U6-26t)-(U6-29p)-(Target-2)**

ATATATGGTCTCGATTGNNNNNNNNNNNNNNNNNNNNGTTTTAGAGCTAGAAATAGCAAGTTAAAATAAG  
 GCTAGTCCGTTATCAACTTGAAAAAGTGGCACCGAGTCGGTGCCTTTTTTTGCAAATTTCCAGATCGATT  
 CTTCTCCTCTGTTCTTCGGCGTTCAATTTCTGGGGTTTTCTCTCGTTTTCTGTAACCTGAAACCTAAAATTTG  
 ACCTAAAAAAAATCTCAAATAATATGATTCAGTGGTTTTGTACTTTTCAGTTAGTTGAGTTTTGCAGTCCGAT  
 GAGATAAACCAATAATTAATCCAACTACTGCAGCCTGACAGACAAATGAGGATGCAAACAATTTTAAAGTTT  
 ATCTAACGCTAGCTGTTTTGTTCTCTCTCTGGTGCACCAACGACGGCGTTTTCTCAATCATAAAGAGGCT  
 TGTTTTACTTAAGGCCAATAATGTTGATGGATCGAAAGAAGAGGGCTTTAATAAACGAGCCCGTTTAAG  
 CTGTAAACGATGTCAAAAACATCCACATCGTTGAGTTGAAAATAGAAGCTCTGTTTATATATTGGTAGAG  
 TCGACTAAGAGATTGNNNNNNNNNNNNNNNNNNNNGTTTAGAGACCAATAAT

**Primers:**

- DT1-BsF: ATATATGGTCTCGATTGNNNNNNNNNNNNNNNNNNNNGTT
- DT1-F0: TGNNNNNNNNNNNNNNNNNNNNGTTTTAGAGCTAGAAATAGC
- DT2-R0: AACNNNNNNNNNNNNNNNNNNNNCAATCTCTTAGTCGACTCTAC
- DT2-BsR: ATTATTGGTCTCGAAACNNNNNNNNNNNNNNNNNNNNCAA

**Template:** pCBC-DT1T2

**Length:** 626-bp

**Notes:**

1. The 19-nt N in primers represent any 19-nt target sequence (forward primers) or reverse complement sequence of any 19-nt target sequence (reverse primers) in front of PAM (NGG).
2. For the assembly of two gRNA expression cassettes, use DT1-BsF/DT1-F0/DT2-R0/DT2-BsR four-primer mixture with DT1-F0/DT2-R0 diluted to 20 times of DT1-BsF or DT2-BsR, resulting in DT1T2-PCR.

## Sequence of one gRNA expression cassette for dicots

23-bp insert + pHSN401 et al.

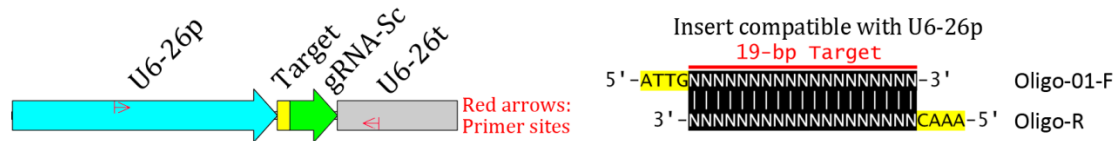

(U6-26p)-(Target-1)-(gRNA-Sc)-(U6-26t)

CGACTTGCCTCCGCACAATACATCATTTCTTCTTAGCTTTTTTCTTCTTCTCGTTCATACAGTTTTTTTTGT  
 TTATCAGCTTACATTTCTTGAACCGTAGCTTTCGTTTTCTTCTTTTAACTTCCATTCCGGAGTTTTGTATCTT  
 GTTTCATAGTTTGTCCAGGATTAGAATGATTAGGCATCGAACCTTCAAGAATTGATTGAATAAAACATCTT  
 CATTCTAAGATATGAAGATAATCTTCAAAGGCCCTGGGAATCTGAAAGAAGAGAAGCAGGCCCATTTATA  
 TGGGAAAGAACAATAGTATTTCTTATATAGGCCCATTTAAGTTGAAAACAATCTTCAAAGTCCACATCGCTT  
 AGATAAGAAAACGAAGCTGAGTTTATATACAGCTAGAGTCGAAGTAGTGATTGNNNNNNNNNNNNNNNN  
 NNNGTTTTAGAGCTAGAAATAGCAAGTTAAAATAAGGCTAGTCCGTTATCAACTGAAAAAGTGGCACCGA  
 GTCGGTGC TTTTTTTTGC AAAATTTCCAGATCGATTTCTTCTTCTCTGTTCTTCGGCGTTCAATTTCTGGGG  
 TTTTCTTCTCGTTTTCTGTAACCTGAAACCTAAAATTTGACCTAAAAAAAATCTCAAATAATATGATTCAGTGTT  
 TTGTACTTTTCAGTTAGTTGAGTTTGCAGTTCGGATGAGATAAACCAATA

### Notes:

- Underlined letters come from binary vectors, while the others come from PCR fragments.
- Red letters indicate primer sites.
- Primer sequences are as follows:

#### Colony PCR primers (5'→3'):

U6-26p-F: TGTCCAGGATTAGAATGATTAGGC

U6-26t-R: CCCAGAAAATTGAACGCCGAAGAAC

(U6-26p-F + U6-26t-R = 423 bp)

#### Sequencing primers (5'→3'):

U6-26p-F: TGTCCAGGATTAGAATGATTAGGC



## Sequence of two gRNA expression cassettes for dicots

DT1DT2-PCR + pHSN401 et al.

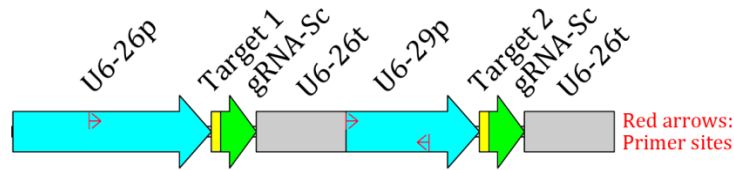

(U6-26p)-(Target-1)-(gRNA-Sc)-(U6-26t)-(U6-29p)-(Target-2)-(gRNA-Sc)-(U6-26t)

CGACTTGCCTCCGCACAATACATCATTCTTCTTAGCTTTTTCTTCTTCTCGTTCATACAGTTTTTTTTTGT  
 TTATCAGCTTACATTTCTTGAACCGTAGCTTTCGTTTTCTTCTTTTAACTTCCATTCGGAGTTTTGTATCTT  
 GTTTCATAGTTTGTCCAGGATTAGAATGATTAGGCATCGAACCTTCAAGAATTGATTGAATAAAACATCTT  
 CATTCTAAGATATGAAGATAATCTTCAAAGGCCCTGGGAATCTGAAAGAAGAGAAGCAGGCCATTATA  
 TGGGAAAGAACAATAGTATTCTTATATAGGCCATTAAAGTTGAAAACAATCTTCAAAGTCCACATCGCTT  
 AGATAAGAAAACGAAGCTGAGTTTATATACAGCTAGAGTCAAGTAGTGATTGNNNNNNNNNNNNNNNN  
 NNNGTTTATAGAGCTAGAAATAGCAAGTAAAATAAGGCTAGTCCGTTATCAACTTGAAAAAGTGGCACCGA  
 GTCGGTGCTTTTTTTTGCAAAATTTCCAGATCGATTTCTTCTTCTCTGTTCTTCGGCGTTCAATTTCTGGGG  
 TTTTCTTCTGTTTTCTGTAACCTGAAACCTAAAATTTGACCTAAAAAAAATCTCAAATAATATGATTCAGTGTT  
 TTGACTTTTTAGTTAGTTGAGTTTTGCAGTTCCGATGAGATAAACCAATA**TTAATCCAACTACTGCAGCCT**  
**GAC**AGACAAATGAGGATGCAACAATTTAAAGTTTATCTAACGCTAGCTGTTTTGTTTCTTCTCTGTTG  
 CACCAACGACGGCGTTTTCTCAATCATAAAGAGGCTTGTTTTACTTAAGGCCAATAAT**GTTGATGGATCGA**  
**AAGAAGAGGCT**TTTAAATAACGAGCCGTTAAGCTGTAAACGATGTCAAAAACATCCACATCGTTCA  
 GTTAAAATAGAAGCTCTGTTTATATATTGGTAGAGTCGACTAAGAGATTGNNNNNNNNNNNNNNNNNN  
 NN**GTTTATAGAGCTAGAAATAGCAAGTAAAATAAGGCTAGTCCGTTATCAACTTGAAAAAGTGGCACCGAGT**  
**CGGTGC**TTTTTTTTGCAAAATTTCCAGATCGATTTCTTCTTCTCTGTTCTTCGGCGTTCAATTTCTGGGGTT  
 TTCTTCTGTTTTCTGTAACCTGAAACCTAAAATTTGACCTAAAAAAAATCTCAAATAATATGATTCAGTGTTTT  
 GTACTTTTCAGTTAGTTGAGTTTTGCAGTTCCGATGAGATAAACCAATA

### Notes:

- Underlined letters come from binary vectors, while the others come from PCR fragments.
- Red letters indicate primer sites.
- Primer sequences are as follows:

#### Colony PCR primers (5'→3'):

U6-26p-F: TGTCCAGGATTAGAATGATTAGGC  
 U6-29p-R: AGCCCTTCTTTCGATCCATCAAC  
 (U6-26p-F + U6-29p-R = 726 bp)

#### Sequencing primers (5'→3'):

U6-26p-F: TGTCCAGGATTAGAATGATTAGGC  
 U6-29p-F: TTAATCCAACTACTGCAGCCTGAC

## Sequence of OsU3p-driven gRNA expression cassette without target

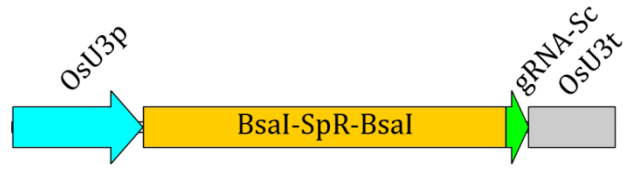

(OsU3p)-(BsaI-SpR-BsaI)-(gRNA-Sc)-(OsU3t)

```

AGTAATTCATCCAGGTCTCCAAGTTCTAGGATTTTCAGAAGCTGCAACTTATTTTATCAAGGAATCTTTAAACATACGAACAGATCA
CTTAAAGTTCTTCTGAAGCAACTTAAAGTTATCAGGCATGCATGGATCTTGAGGAATCAGATGTGCAGTCAGGGACCATAGCA
CAAGACAGGCGTCTTCTACTGGTGTACCAGCAATGCTGGAAGCCGGGAACACTGGGTACGTTGAAACCACGTGATGTGA
AGAAGTAAGATAAACTGTAGGAGAAAAGCATTTCGTAGTGGGCCATGAAGCCTTTCAGGACATGTATTGCAGTATGGGCCGGC
CCATTACGCAATTGGACGACAACAAAGACTAGTATTAGTACCACCTCGGCTATCCACATAGATCAAAGCTGATTTAAAGAGTTG
TGCAGATGATCCGTGGCGTTGAGACCAACCCAGTGGACATAAGCCTGTTGCGTTCGTAAGCTGTAATGCAAGTAGCGT
ATGCGCTCACGCAACTGGTCCAGAACCTTGACCGAACGCAGCGGTGGTAACGGCGCAGTGGCGGTTTTATGGCTTGTATGA
CTGTTTTTTGGGGTACAGTCTATGCCTCGGCATCCAAGCAGCAAGCGCTTACGCCGTGGGTTCGATGTTGATGTTATGGAG
CAGCAACGATGTACGAGCAGGGCAGTCGCCCTAAACAAAGTTAAACATCATGGGGGAAGCGGTGATCGCCGAAGTATCG
ACTCAACTATCAGAGGTAGTTGGCGTCATCGAGCGCCATCTCGAACCGACGTTGCTGGCCGTACATTTGTACGGCTCCGCAGTG
GATGGCGGCCTGAAGCCACACAGTGATATTGATTTGCTGGTACGGTGACCGTAAGGCTTGATGAAACAACGGCGGAGCTTT
GATCAACGACCTTTTGAAACTTCGGCTTCCCTGGAGAGAGCGAGATTCTCCGCGCTGTAGAAGTCAACATTGTTGTGCAGC
ACGACATCATTCCGTGGCGTTATCCAGCTAAGCGCAACTGCAATTTGGAGAATGGCAGCGCAATGACATTCTGCAGGTATCT
TCGAGCCAGCCACGATCGACATTGATCTGGCTATCTTGCTGACAAAAGCAAGAGAACATAGCGTTGCCTTGGTAGGTCCAGCG
CGGAGGAACTCTTTGATCCGGTTCCTGAACAGGATCTATTTGAGGCGCTAAATGAAACCTTAACGCTATGGAACCTCGCCGCC
GACTGGGCTGGCGATGAGCGAAATGTAGTGCTTACGTTGTCCCGCATTGGTACAGCGCAGTAACCGGCAAAATCGCGCCGAA
GGATGTCGCTGCCACTGGGCAATGGAGCGCCTGCCGGCCAGTATCAGCCGTCATACTTGAAGCTAGACAGGCTTATCTTG
GACAAGAAGAAGATCGCTTGGCCTCGCGCGCAGATCAGTTGGAAGAATTTGCTCACTACGTGAAAGGCGAGATCACCAAGGT
AGTCGGCAAATAATGTCTAGCTAGAAATTCGTTCAAGCCGACGCCGCTTCGCGGCGCGGCTTAACCTAAGCGTTAGATGACTA
AGCACATAATTGCTCACAGCCAAACTATCAGGTCAAGTCTGCTTTTATTATTTTAAAGCGTGCATAATAAGCCGGTCTCG
GTTTAGAGCTAGAAATAGCAAGTTAAAATAAGGCTAGTCCGTTATCAACTTGAAAAAGTGGCACCGAGTCGGTGCTTTTTTTTT
TCGTTTTGCATTGAGTTTTCTCCGTCGCATGTTTGACAGTTTATTTCCGTTTTGCATTGAAATTTCTCCGTCTCATGTTTGACGCG
TGTTCAAAAAGTACGAGCTGTATTTCACTATTTACGGCGCCACATTTTCATGCCGTTTGTGCCAACTATCCCAGCTAGTGAAT
ACAGCTTGGCTTACACAACACTGGTGACCCGCTGACCTGCTCGTACCTCGTACCGTTCGTACGGCACAGCATTGGAATTAAG
GGTGTGATCGATACTGCTTGCTGCT
    
```

### Notes:

1. The OsU3p contains a *BsaI* site affected by Dcm methylation and therefore uncuttable when vectors are proliferated in commonly used *E. coli* strains (dcm+).
2. Enlarged and boxed letters indicate *BsaI* sites.

**Sequence of MT1T2-PCR with Targets 1 and 2 for monocots**

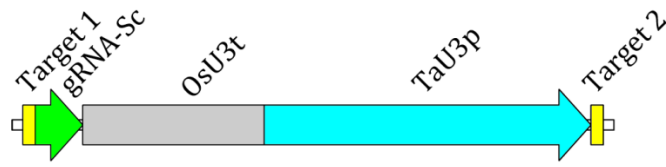

(Target-1)-(gRNA-Sc)-(OsU3t)-(TaU3p)-(Target-2)  
 ATATATGGTCTCTGGCGNNNNNNNNNNNNNNNNNNNNGTTTTAGAGCTAGAAATAGCAAGTTAAAATAAG  
 GCTAGTCCGTTATCAACTTGAAAAAGTGGCACCGAGTCGGTCTTTTTTTTTTCGTTTTGCATTGAGTTTTCT  
 CCGTCGCATGTTTGCAGTTTTATTTCCGTTTGCATTGAAATTTCTCCGTCTCATGTTTGCAGCGTGTCAAAA  
 AAGTACGCAGCTGTATTTCACTTATTTACGGCGCCACATTTTCATGCCGTTTGTGCCAACTATCCCGAGCTAGT  
 GAATACAGCTTGGCTTACACAACACTGGTGACCCGCTGACCTGCTCGTACCTCGTACCGTCTGACGGCACA  
 GCATTTGGAATTAAGGGTGTGATCGATACTGCTTGCTGCTCATGAATCCAACCACACGGAGTTCAAATTCC  
 CACAGATTAAGGCTCGTCCGTCGCACAAGGTAATGTGTGAATATTATATCTGTCGTGCAAATTCCTGGCCT  
 GCACAATTGCTGTATAGTTGGCGGCAGGGAGAGTTTAACTTACTAGCTGCTGATAATTTGTGAGAAA  
 TAATAATTGACAAGTAGATACTGACATTTGAGAAGAGCTTCTGAAGTATTATAGTAACAAAAATGGAAAGCT  
 GATGCACGGAAAAAGGAAAAGAAAAGCCATACTTTTTTTAGGTAGGAAAAGAAAAGCCATACGAGACT  
 GATGTCTCTCAGATGGCCGGGATCTGTCTATCTAGCAGGCAGCCCCAACCTCACGGGCCAGCAATT  
 ACGAGTCTTCTAAAAGCTCCCGCCGAGGGGCGCTGGCGTCTGTGCAGCAGCACGTCTAACATTAGTCC  
 CACCTCGCCAGTTTACAGGGAGCAGAACCAGCTATAAGCGGAGGCGCGGCACCAAGAAGCGNNNNNNNN  
 NNNNNNNNNNNNNGTTTTAGAGACCAATAAT

**Primers:**

MT1-BsF: ATATATGGTCTCTGGCGNNNNNNNNNNNNNNNNNNNNGTT  
 MT1-F0: TNNNNNNNNNNNNNNNNNNNNGTTTTAGAGCTAGAAATAGC  
 MT2-R0: AACNNNNNNNNNNNNNNNNNNNCGCTTCTTGGTGCC  
 MT2-BsR: ATTATTGGTCTCTAAACNNNNNNNNNNNNNNNNNNNNC

**Template:** pCBC-MT1T2

**Length:** 964-bp

**Notes:**

1. The 19-nt N in primers represent any 19-nt target sequence (forward primers) or reverse complement sequence of any 19-nt target sequence (reverse primers) in front of PAM (NGG).
2. For the assembly of two gRNA expression cassettes, use MT1-BsF/MT1-F0/MT2-R0/MT2-BsR four-primer mixture with MT1-F0/MT2-R0 diluted to 20 times of MT1-BsF or MT2-BsR, resulting in MT1T2-PCR.

## Sequence of one gRNA expression cassette for monocots

23-bp insert + pBUN411 et al.

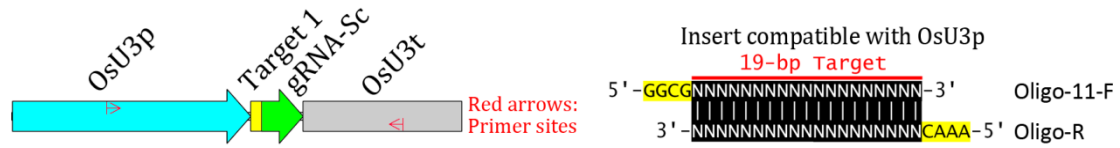

(OsU3p)-(Target-1)-(gRNA-Sc)-(OsU3t)

```

AGTAATTCATCCAGGTCTCCAAGTTCAGGATTTTCAGAACTGCAACTATTTTATCAAGGAATCTTAAACATACGAACAGATCA
CTTAAAGTCTCTCTGAAGCAACTTAAAGTTATCAGGCATGCATGGATCTTGGAGGAATCAGATGTGCAGTCAGGGACCATAGCA
CAA GACAGGCGTCTTCTACTGGTGCTACCAGCAAATGCTGGAAGCCGGGAACACTGGGTACGTTGGAAACCACGTGATGTGA
AGAAGTAAGATAAACTGTAGGAGAAAAGCATTTCGTAGTGGGCCATGAAGCCTTTCAGGACATGTATTGCAGTATGGCCGGC
CCATTACGCAATTGGACGACAACAAAGACTAGTATTAGTACCACCTCGGCTATCCACATAGATCAAAGCTGATTTAAAGAGTTG
TGCAGATGATCCGTGGCGNNNNNNNNNNNNNNNNNNNNGTTTAGAGCTAGAAATAGCAAGTTAAAATAAGGCTAGCCGTT
ATCAACTTGAAAAAGTGGCACCGAGTCGGTGCTTTTTTTTTCGTTTTGCATTGAGTTTCTCCGTGCGCATGTTGCAGTTTTATT
TTCCGTTTTGCATTGAAATTTCTCCGTCTCATGTTGCAGCGTGTCAAAAAGTACGCAGCTGTATTTCACTTATTTACGGCGCCA
CATTTCATGCCGTTTGTGCCAACTATCCCGAGCTAGTGAATACAGCTTGGCTTACACAACACTGGTGACCCGCTGACCTGCT
CGTACCTCGTACCGTCGTACGGCACAGCATTGGAATTAAGGGTGTGATCGATACTGCTTGCTGCT
    
```

### Notes:

- Underlined letters come from binary vectors, while the others come from PCR fragments.
- The OsU3p from vectors contains a *Bsa*I site affected by Dcm methylation and therefore uncuttable when vectors are proliferated in commonly-used *E. coli* strains (dcm+).
- Red letters indicate primer sites.
- Primer sequences are as follows:

#### Colony PCR primers (5'→3'):

OsU3p-F3: GACAGGCGTCTTCTACTGGTGCTAC

OsU3t-R: TATCACTAGCTCGGGATAGTTGGC

(OsU3p-F3 + OsU3t-R = 543 bp)

#### Sequencing primers (5'→3'):

OsU3p-F3: GACAGGCGTCTTCTACTGGTGCTAC

## Sequence of two gRNA expression cassettes for monocots

MT1T2-PCR + pBUN411 et al.

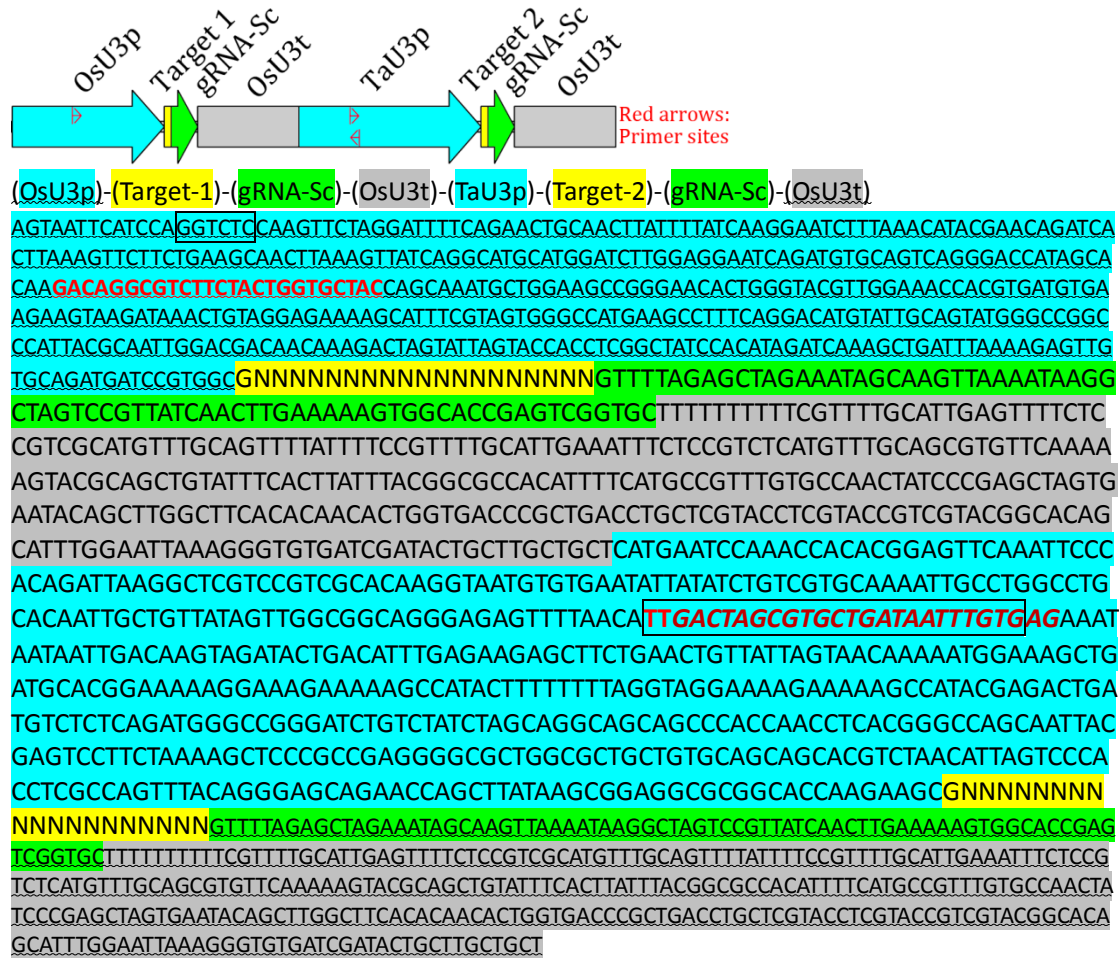

### Notes:

- Underlined letters come from binary vectors, while the others come from PCR fragments.
- Red letters indicate primer sites.
- Primer sequences are as follows:

#### Colony PCR primers (5'→3'):

OsU3p-F3: GACAGGCGTCTTCTACTGGTGCTAC  
 TaU3p-R: CTCACAATTATCAGCACGCTAGTC  
 (OsU3p-F3 + TaU3p-R = 825 bp)

#### Sequencing primers (5'→3'):

OsU3p-F3: GACAGGCGTCTTCTACTGGTGCTAC  
 TaU3p-F2: TTGACTAGCGTGCTGATAATTTGTG
