# Supplementary material for: A CRISPR/Cas9 toolkit for multiplex genome editing in plants
Source: Springer Nature journal article supplement (doi:10.1186/s12870-014-0327-y), 2014-11-28
Supplement: 12870_2014_327_MOESM5_ESM.pdf [file 12870_2014_327_MOESM5_ESM.pdf]

## Additional file 5

### Methods S4

#### Gibson Assembly method for the assembly of three or four gRNAs

##### Table of contents

|                                                                               |    |
|-------------------------------------------------------------------------------|----|
| Simplified protocol .....                                                     | 2  |
| Table S4-1 Nomenclature of PCR products and primers for Gibson Assembly ..... | 3  |
| Sequence of DT1T2-PCR0 with Targets 1 and 2 for dicots .....                  | 4  |
| Sequence of DT2T3-PCR/PCR0 with Targets 2 and 3 for dicots.....               | 5  |
| Sequence of DT3T4-PCR with Targets 3 and 4 for dicots.....                    | 6  |
| Sequence of DT1-T3-PCR with Targets 1, 2 and 3 for dicots .....               | 7  |
| Sequence of DT1-T4-PCR with Targets 1, 2, 3 and 4 for dicots.....             | 8  |
| Sequence of three gRNA expression cassettes for dicots.....                   | 9  |
| Sequence of four gRNA expression cassettes for dicots.....                    | 10 |
| Sequence of MT1T2-PCR0 with Targets 1 and 2 for monocots .....                | 11 |
| Sequence of MT2T3-PCR/PCR0 with Targets 2 and 3 for monocots .....            | 12 |
| Sequence of MT3T4-PCR with Targets 3 and 4 for monocots .....                 | 13 |
| Sequence of MT1-T3-PCR with Targets 1, 2 and 3 for monocots .....             | 14 |
| Sequence of MT1-T4-PCR with Targets 1, 2, 3 and 4 for monocots .....          | 15 |
| Sequence of three gRNA expression cassettes for monocots .....                | 16 |
| Sequence of four gRNA expression cassettes for monocots .....                 | 17 |

## Simplified protocol

1. Manually search for 23-bp target sites (5'-N<sub>20</sub>NGG-3') within exons of genomic DNA sequences of genes of interest, and then evaluate target specificities on the website of potential off-target finder (<http://www.rgenome.net/cas-offfinder/>). Users can also search for target sites on the website of genome-wide prediction of plant CRISPR/Cas9 target sites (<http://www.genome.arizona.edu/crispr/CRISPRsearch.html>).
2. Design primers:
  - a) Find names of PCR fragments and primers according to plant species (monocots or dicots) and gRNA numbers in Table S4-1.
  - b) Find the sequences of the primers according to the names.
  - c) Replace 19-nt N in the forward primers with your 19-nt target sequences in front of PAM (NGG), and 19-nt N in the reverse primers with reverse complement sequences of your 19-nt target sequences in front of PAM (NGG).
3. Carry out PCR reactions according to information provided under the sequences of the PCR fragments. Refer to Additional file 3: Methods S2.
4. Set up Gibson Assembly reactions according to the manufacturer's protocol (NEB). As an example, the reaction mixture and reaction conditions are as follows for construction of a vector carrying four gRNAs:

| Component                       | Volume | Assembly conditions |
|---------------------------------|--------|---------------------|
| Purified DT1T2-PCR (~100 ng/μl) | 2 μl   | 50 °C, 1 h          |
| Purified DT2T3-PCR (~100 ng/μl) | 2 μl   |                     |
| Purified DT3T4-PCR (~100 ng/μl) | 2 μl   |                     |
| Gibson Assembly Master Mix (2×) | 10 μl  |                     |
| ddH <sub>2</sub> O              | 4 μl   |                     |
| Total volume                    | 20 μl  |                     |

5. The fragment of corrected size (1.9-kb) was gel purified and used as PCR template for the second round of PCR amplification.
6. The second round of PCR products (DT1-T4-PCR) were purified and mixed with any of the binary vectors described in this report to set up Golden Gate reaction. Refer to Additional file 3: Methods S2.
7. Transform *E. coli* competent cells, select positive clones on kanamycin LB agar plates.
8. Identify correct clones by colony PCR and verify them by sequencing.

**Table S4-1 Nomenclature of PCR products and primers for Gibson Assembly**

| <b>For dicots</b>                           |                                        |                                      |                 |                                  |                 |
|---------------------------------------------|----------------------------------------|--------------------------------------|-----------------|----------------------------------|-----------------|
| The 1st Round of PCR                        |                                        |                                      | Gibson Assembly | The 2nd Round of PCR             | Number of gRNAs |
|                                             | DT1T2-PCR0<br>DT1-BsF/DT1-F0<br>DT2-R  | DT2T3-PCR0<br>DT2-F/DT2-F0<br>DT3-R  |                 |                                  |                 |
| DT2T3-PCR<br>DT2-F/DT2-F0<br>DT3-R0/DT3-BsR | +                                      | -                                    | DT1-T3-GA       | DT1-T3-PCR<br>DT1-BsF<br>DT3-BsR | 3               |
| DT3T4-PCR<br>DT3-F/DT3-F0<br>DT4-R0/DT4-BsR | +                                      | +                                    | DT1-T4-GA       | DT1-T4-PCR<br>DT1-BsF<br>DT4-BsR | 4               |
| <b>For monocots</b>                         |                                        |                                      |                 |                                  |                 |
| The 1st Round of PCR                        |                                        |                                      | Gibson Assembly | The 2nd Round of PCR             | Number of gRNAs |
|                                             | MT1T2-PCR0<br>MT1-BsF/MT1-F0<br>MT2-R0 | MT2T3-PCR0<br>MT2-F/MT2-F0<br>MT3-R0 |                 |                                  |                 |
| MT2T3-PCR<br>MT2-F/MT2-F0<br>MT3-R0/MT3-BsR | +                                      | -                                    | MT1-T3-GA       | MT1-T3-PCR<br>MT1-BsF<br>MT3-BsR | 3               |
| MT3T4-PCR<br>MT3-F/MT3-F0<br>MT4-R0/MT4-BsR | +                                      | +                                    | MT1-T4-GA       | MT1-T4-PCR<br>MT1-BsF<br>MT4-BsR | 4               |

**Notes:**

1. The primer names are under the PCR names and highlighted.
2. "+" or "-" indicates whether or not the PCR fragment in the column is mixed with the PCR fragment in the row of Column 1 for Gibson Assembly.
3. When using more than two PCR primers, dilute the F0/R0 primers to 20 times of the F/R primers.

**Sequence of DT1T2-PCR0 with Targets 1 and 2 for dicots**

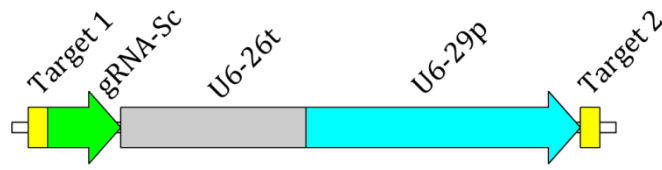

**(Target-1)-(gRNA-Sc)-(U6-26t)-(U6-29p)-(Target-2)**

ATATATGGTCTCGATTGNNNNNNNNNNNNNNNNNNNNGTTTTAGAGCTAGAAATAGCAAGTTAAAATAAG  
GCTAGTCCGTTATCAACTTGAAAAAGTGGCACCGAGTCGGTGTCTTTTTTGCAAAATTTCCAGATCGATT  
CTTCTCTCTGTTCTTCGGCGTTCAATTTCTGGGGTTTTCTCTCGTTTTCTGTAACCTGAAACCTAAAATTTG  
ACCTAAAAAAAATCTCAAATAATATGATTCAGTGGTTTTGTACTTTTCAGTTAGTTGAGTTTTGCAGTCCGAT  
GAGATAAACCAATAATAATCCAACTACTGCAGCCTGACAGACAAATGAGGATGCAAACAATTTTAAAGTTT  
ATCTAACGCTAGCTGTTTTGTTCTTCTCTCTGGTGCACCAACGACGGCGTTTTCTCAATCATAAAGAGGCT  
TGTTTTACTTAAGGCCAATAATGTTGATGGATCGAAAGAAGAGGGCTTTAATAAACGAGCCCGTTTAAG  
CTGTAAACGATGTCAAAAACATCCCACATCGTTTCAGTTGAAAATAGAAGCTCTGTTTATATATTGGTAGAG  
TCGACTAAGAGATTGNNNNNNNNNNNNNNNNNNNNGTT

**Primers:**

- DT1-BsF: ATATATGGTCTCGATTGNNNNNNNNNNNNNNNNNNNNGTT
- DT1-F0: TGNNNNNNNNNNNNNNNNNNNNGTTTTAGAGCTAGAAATAGC
- DT2-R: AACNNNNNNNNNNNNNNNNNNNNCAATCTCTTAGTCGACTCTAC

**Template:** pCBC-DT1T2

**Length:** 612-bp

**Notes:**

1. The 19-nt N in primers represent any 19-nt target sequence (forward primers) or reverse complement sequence of any 19-nt target sequence (reverse primers) in front of PAM (NGG).
2. Use DT1-BsF/DT1-F0/DT2-R three-primer mixture with DT1-F0 diluted to 20 times of DT1-BsF or DT2-R, resulting in DT1T2-PCR0.

## Sequence of DT2T3-PCR/PCRO with Targets 2 and 3 for dicots

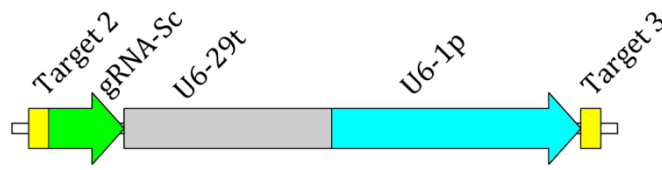

(Target-2)-(gRNA-Sc)-(U6-29t)-(U6-1p)-(Target-3)

```
GTAGAGTCGACTAAGAGATTGNNNNNNNNNNNNNNNNNNNNGTTTTAGAGCTAGAAATAGCAAGTTAAA
ATAAGGCTAGTCCGTTATCAACTTGAAAAAGTGGCACCAGTCGGTGC TTTTTTGGATAGAATTTCCAGC
TTTTTGGCGTGTTTCAGCTCTCATGATCCTTGGCCAATGGGTGTAGTAAATTTCTGCACATTCATTGGATG
GAAAAAATGGTTTTAGCTTAGGGAATAAGAAAAGTGTATAGGAAGGGGATTTTTGTACAATCACATTT
GAATTAGGTCCTTGAAATGACAGGGAATGAGGACATATGATGAGACGGTCATTGTTTTAGTTCCACCACG
ATTATATTGAAATTTACGTGAGTGTGAGTGAGACTTGCATAAGAAAATAAAATCTTTAGTTGGGAAAAA
ATTCAATAATAAATGGGCTTGAGAAGGAAGCGAGGGATAGGCCTTTTTCTAAAATAGGCCCATTTAAG
CTATTAACAATCTTCAAAAGTACCACAGCGCTTAGGTAAGAAAAGCAGCTGAGTTTATATATGGTTAGAG
ACGAAGTAGTGATTGNNNNNNNNNNNNNNNNNNNNNGTT
```

### Primers:

DT2-F: GTAGAGTCGACTAAGAGATTGNNNNNNNNNNNNNNNNNNNNNGTT  
 DT2-F0: 5' TGNNNNNNNNNNNNNNNNNNNNGTTTTAGAGCTAGAAATAGC 3'  
 DT3-R0/R: 5' AACNNNNNNNNNNNNNNNNNNNNCAATCACTACTTCGTCTCTAACC 3'  
 DT3-BsR: 5' ATTATTGGTCTCGAAACNNNNNNNNNNNNNNNNNNNNNC 3'

**Template:** pCBC-DT2T3

**Length:** 613-bp (DT2T3-PCR) or 599-bp (DT2T3-PCRO)

### Notes:

1. The 19-nt N in primers represent any 19-nt target sequence (forward primers) or reverse complement sequence of any 19-nt target sequence (reverse primers) in front of PAM (NGG).
2. For the assembly of three gRNA expression cassettes, use DT2-F/DT2-F0/DT3-R0/DT3-BsR four-primer mixture with DT2-F0/DT3-R0 diluted to 20 times of DT2-F or DT3-BsR, resulting in DT2T3-PCR.
3. For the assembly of more than three gRNA expression cassettes, use DT2-F/DT2-F0/DT3-R three-primer mixture with DT2-F0 diluted to 20 times of DT2-F or DT3-R, resulting in DT2T3-PCRO.

**Sequence of DT3T4-PCR with Targets 3 and 4 for dicots**

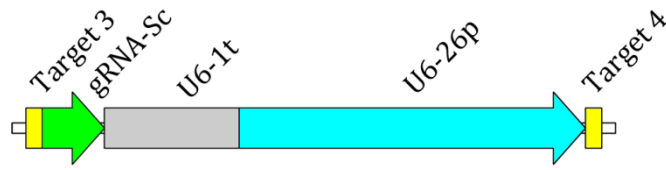

**(Target-3)-(gRNA-Sc)-(U61-t)-(U6-26p)-(Target-4)**

GGTTAGAGACGAAGTAGTGATTGNNNNNNNNNNNNNNNNNNNNGTTTTAGAGCTAGAAATAGCAAGTTA  
AAATAAGGCTAGTCCGTTATCAACTGAAAAAGTGGCACCGAGTCGGTGC TTTTTTTGGCAAAAATTTTCA  
GATTTTTTCTTCATCTGTAGATTTCTGGGTTTTTTTTCCGTTTCGTGAATCATAAGTGAAGTTTTGGATGCA  
AATCTGCGCGAAAAAAGTTGGACCTGCAATGAGCTTATTTAGATAGCTAAGACAAAGTGATTGGTCCGTT  
CGACTTGCCTCCGCACAATACATCATTCTTCTTAGCTTTTTTCTTCTTCTCGTTCATACAGTTTTTTTTGT  
TTATCAGCTTACATTTTCTGAACCGTAGCTTTCGTTTTCTTCTTTTAACTTCCATTCCGGAGTTTTTGTATCTT  
GTTTCATAGTTTGTCCAGGATTAGAATGATTAGGCATCGAACCTCAAGAATTTGATTGAATAAACATCTTC  
ATTCTTAAGATATGAAGATAATCTTCAAAGGCCCTGGGAATCTGAAAGAAGAGAAGCAGGCCCATTTATAT  
GGGAAAGAACAATAGTATTTCTTATATAGGCCCATTTAAGTTGAAAACAATCTTCAAAGTCCCACATCGCTT  
AGATAAGAAAACGAAGCTGAGTTTATATACAGCTAGAGTCGAAGTAGTGATTGNNNNNNNNNNNNNNNNNN  
NNNGTTTTGAGACCAATAAT

**Primers:**

DT3-F: GGTTAGAGACGAAGTAGTGATTGNNNNNNNNNNNNNNNNNNNNGTT  
DT3-F0: TGNNNNNNNNNNNNNNNNNNNNGTTTTAGAGCTAGAAATAGC  
DT4-R0: AACNNNNNNNNNNNNNNNNNNNNCAATCACTACTCGACTCTAGC  
DT4-BsR: ATTATTGGTCTCGAAACNNNNNNNNNNNNNNNNNNNNC

**Template:** pCBC-DT3T4

**Length:** 746-bp

**Notes:**

1. The 19-nt N in primers represent any 19-nt target sequence (forward primers) or reverse complement sequence of any 19-nt target sequence (reverse primers) in front of PAM (NGG).
2. For the assembly of four gRNA expression cassettes, use DT3-F/DT3-F0/DT4-R0/DT4-BsR four-primer mixture with DT3-F0/DT4-R0 diluted to 20 times of DT3-F or DT4-BsR.

**Sequence of DT1-T3-PCR with Targets 1, 2 and 3 for dicots**

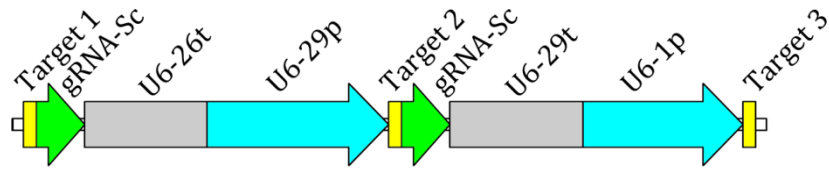

**(Target-1)-(gRNA-Sc)-(U6-26t)-(U6-29p)-(Target-2)-(gRNA-Sc)-(U6-29t)-(U6-1p)-(Target-3)**  
 ATATATGGTCTCGATTGNNNNNNNNNNNNNNNNNNNNGTTTTAGAGCTAGAAATAGCAAGTTAAAATAAG  
 GCTAGTCCGTTATCAACTTGAAAAAGTGGCACCGAGTCGGTGCCTTTTTTTGCAAATTTCCAGATCGATT  
 CTTCTTCCTCTGTTCTTCGGCGTTCATTTCTGGGGTTTTCTCTCGTTTTCTGTAAGTAAACCTAAAATTTG  
 ACCTAAAAAAATCTCAAATAATATGATTCAGTGGTTTTGACTTTTTCAGTTAGTTGAGTTTTGCAGTCCGAT  
 GAGATAAACCAATATTAATCCAACTACTGCAGCCTGACAGACAAATGAGGATGCAAACAATTTTAAAGTTT  
 ATCTAACGCTAGCTGTTTTGTTTCTCTCTCTGGTGCACCAACGACGGCGTTTTCTCAATCATAAAGAGGCT  
 TGTTTTACTTAAGGCCAATAATGTTGATGGATCGAAAGAAGAGGGCTTTAATAAACGAGCCGTTTAAG  
 CTGTAACGATGTCAAAAACATCCACATCGTTTCAGTTGAAAATAGAAGCTCTGTTTATATATTGGTAGAG  
 TCGACTAAGAGATTGNNNNNNNNNNNNNNNNNNNNGTTTTAGAGCTAGAAATAGCAAGTTAAAATAAGG  
 CTAGTCCGTTATCAACTTGAAAAAGTGGCACCGAGTCGGTGCCTTTTTTTGGATAGAATTTCCAGCTTTTTG  
 CGTGTTCAGCTCTCATGATCCTTGGCCAATGGGTGTAGTAAATTTCTGCACATTCATTGGATGGAAAAT  
 AATGGTTTTAGCTTAGGGAATAAGAAAAGTGTATAGGAAGGGGATTTTTGTACAATCACATTTGAATTA  
 GGTCTTTGAAATGACAGGGAATGAGGACATATGATGAGACGGTCATTGTTTTAGTTCCACCACGATTATA  
 TTTGAAATTTACGTGAGTGTGAGTGAGACTGCATAAGAAAATAAAATCTTTAGTTGGGAAAAAATCAAT  
 AATATAAATGGGCTTGAGAAGGAAGCGAGGGATAGGCCTTTTTCTAAAATAGGCCATTTAAGCTATTAA  
 CAATCTTCAAAAGTACCACAGCGTTAGGTAAGAAAGCAGCTGAGTTTATATATGTTAGAGACGAAGT  
 AGTGATTGNNNNNNNNNNNNNNNNNNNNGTTTCGAGACCAATAAT

**Primers:**

DT1-BsF: ATATATGGTCTCGATTGNNNNNNNNNNNNNNNNNNNNGTT  
 DT3-BsR: ATTATTGGTCTCGAAACNNNNNNNNNNNNNNNNNNNNCAA

**Template:**

Gibson Assembly product of the DT1T2-PCR and DT2T3-PCR fragments was used as template for PCR amplification with DT1-BsF/DT3-BsR primers, resulting in DT1-T3-PCR.

**Length:** 1.2-kb

**Sequence of DT1-T4-PCR with Targets 1, 2, 3 and 4 for dicots**

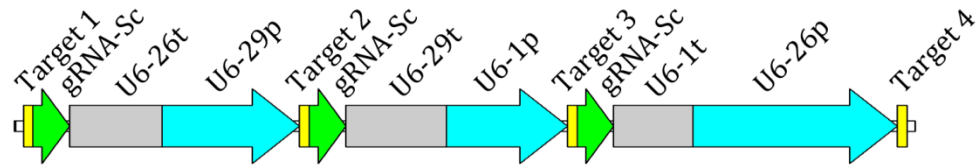

**(Target-1)-(gRNA-Sc)-(U6-26t)-(U6-29p)-(Target-2)-(gRNA-Sc)-(U6-29t)-(U6-1p)-(Target-3)-(gRNA-Sc)-(U6-1t)-(U6-26p)-(Target-4)**

ATATATGGTCTCGATTGNNNNNNNNNNNNNNNNNNNNGTTTTAGAGCTAGAAATAGCAAGTTAAAATAAG  
GCTAGTCCGTTATCAACTTGAAAAAGTGGCACCGAGTCGGTGTCTTTTTTGCAAATTTCCAGATCGATT  
CTTCTCTCTGTTCTTCGGCGTTCAATTTCTGGGGTTTTCTCTCGTTTTCTGTAAGTAAACCTAAAATTTG  
ACCTAAAAAAAATCTCAAATAATATGATTCAGTGGTTTTGTACTTTTCAGTTAGTTGAGTTTTGCAGTCCGAT  
GAGATAAACCAATTAATCCAACTACTGCAGCCTGACAGACAAATGAGGATGCAAACAATTTTAAAGTTT  
ATCTAACGCTAGCTGTTTTGTTTCTCTCTCTGGTGCACCAACGACGGCGTTTTCTCAATCATAAAGAGGCT  
TGTTTTACTTAAGGCCAATAATGTTGATGGATCGAAAGAAGAGGGCTTTAATAAACGAGCCCGTTAAG  
CTGTAAACGATGTCAAAAACATCCCACATCGTTTCAGTTGAAAATAGAAGCTCTGTTTATATATTGGTAGAG  
TCGACTAAGAGATTGNNNNNNNNNNNNNNNNNNNNGTTTTAGAGCTAGAAATAGCAAGTTAAAATAAGG  
CTAGTCCGTTATCAACTTGAAAAAGTGGCACCGAGTCGGTGTCTTTTTTGGATAGAATTTCCAGCTTTTTG  
CGTGTTCAGCTCTCATGATCCTTGGCCAATGGGTGTAGTAAATTTCTGCACATTCATTGGATGGAAAAT  
AATGGTTTTAGCTTAGGGAATAAGAAAAGTGTATAGGAAGGGGATTTTTGTACAATCACATTTGAATTA  
GGTCTTTGAAATGACAGGGAATGAGGACATATGATGACGGTCATTGTTTTAGTCCACCACGATTATA  
TTTGAATTTACGTGAGTGTGAGTGCATAAGAAAATAAAATCTTAGTTGGGAAAAAATCAAT  
AATATAAATGGGCTTGAGAAGGAAGCGAGGGATAGGCCTTTTCTAAAATAGGCCATTTAAGCTATTAA  
CAATCTTCAAAGTACCACAGCGCTTAGGTAAAGAAAGCAGCTGAGTTTATATATGGTTAGAGACGAAGT  
AGTGATTGNNNNNNNNNNNNNNNNNNNNGTTTTAGAGCTAGAAATAGCAAGTTAAAATAAGGCTAGTCC  
GTTATCAACTTGAAAAAGTGGCACCGAGTCGGTGTCTTTTTTGGCAAATTTTCAGATTTTTCTTCATCT  
GTAGATTTCTGGGTTTTTTTTCCGTTTCGTGAATCATAAGTGAAGTTTTGGATGCAAATCTGCGCGAAAA  
AAGTTGGACCTGCAATGAGCTTATTAGATAGCTAAGACAAAAGTATTGGTCCGTTGACTTGCCTCCGC  
ACAATACATCTTCTCTAGCTTTTTCTTCTTCTCGTTCATACAGTTTTTTTTGTTTATCAGCTTACATTT  
TCTTGAACCGTAGCTTTCGTTTTCTTCTTTAACTTCCATTCGGAGTTTTGTATCTGTTTCATAGTTTGT  
CCAGGATTAGAATGATTAGGCATCGAACCTCAAGAATTTGATTGAATAAACATCTTCATCTTAAGATATGA  
AGATAATCTTCAAAGGCCCTGGGAATCTGAAAGAAGAGAAGCAGGCCCATTTATATGGGAAAGAACAAT  
AGTATTCTTATATAGGCCATTTAAGTTGAAAACAATCTTCAAAGTCCCACATCGCTTAGATAAGAAAACGA  
AGCTGAGTTTATACAGCTAGAGTCGAAGTAGTGATTGNNNNNNNNNNNNNNNNNNNNGTTTCGAGACC  
ATAAT

**Primers:**

DT1-BsF: ATATATGGTCTCGATTGNNNNNNNNNNNNNNNNNNNNGTT

DT4-BsR: ATTATTGGTCTCGAAACNNNNNNNNNNNNNNNNNNNNCAA

**Template:**

Gibson Assembly product of the DT1T2-PCR, DT2T3-PCR and DT3T4-PCR fragments was used as template for the second round of PCR amplification with DT1-BsF/DT4-BsR primers, resulting in DT1-T4-PCR.

**Length:** 1.9-kb



## Sequence of three gRNA expression cassettes for dicots

DT1-T3-PCR + pHSN401 et al.

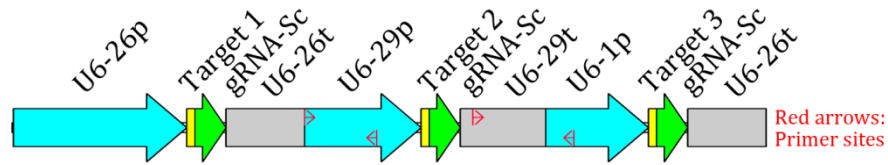

(U6-26p)-(Target-1)-(gRNA-Sc)-(U6-26t)-(U6-29p)-(Target-2)-(gRNA-Sc)-(U6-29t)-  
(U6-1p)-(Target-3)-(gRNA-Sc)-(U6-26t)

CGACTTGCCTTCGCACAATACATCATTCTTCTAGCTTTTTTCTTCTTCTCGTTCATACAGTTTTTTTTGT  
TTATCAGCTTACATTTTCTTGAACCGTAGCTTTCGTTTTCTTCTTTTAACTTCCATTCCGAGTTTTGTATCTT  
GTTTCATAGTTTGTCCAGGATTAGAATGATTAGGCATCGAACCTCAAGAATTTGATTGAATAAACATCTTC  
ATTCTAAGATATGAAGATAATCTTCAAAGGCCCTGGGAATCTGAAAGAAGAGAAGCAGGCCCATTTATAT  
GGGAAAGAACAATAGTATTTCTTATATAGGCCATTTAAGTTGAAAACAATCTTCAAAGTCCCACATCGCTT  
AGATAAGAAAACGAAGCTGAGTTTATATACAGCTAGAGTCAAGTAGTGATTGNNNNNNNNNNNNNNNN  
NNNGTTTTAGAGCTAGAAATAGCAAGTTAAAATAAGGCTAGTCCGTTATCAACTTGAAAAAGTGGCACCGA  
GTCGGTGTCTTTTTTTGCAAAATTTCCAGATCGATTTCTTCTTCTGTTCTTCCGGCGTTCAATTTCTGGGG  
TTTTCTTCTGTTTTCTGTAACCTGAAACCTAAAATTTGACCTAAAAAAAATCTCAAATAATATGATTCAGTGGTT  
TTGACTTTTTCAGTTAGTTGAGTTTGCAGTCCGATGAGATAAACCAATA**TTAATCCAACTACTGCAGCCT**  
**GAC**AGACAAATGAGGATGCAAACAATTTAAAGTTTATCTAACGCTAGCTGTTTTGTTTCTTCTCTGTTG  
CACCAACGACGGCGTTTTCTCAATCATAAAGAGGCTGTTTTACTTAAGGCCAATAAT**GTTGATGGATCGA**  
**AAGAAGAGGGCT**TTTAATAAACGAGCCGTTAAGCTGTAAACGATGTCAAAAACATCCACATCGTTCA  
GTTGAAAATAGAAGCTCTGTTTATATATTGGTAGAGTCGACTAAGAGATTGNNNNNNNNNNNNNNNN  
NNGTTTTAGAGCTAGAAATAGCAAGTTAAAATAAGGCTAGTCCGTTATCAACTTGAAAAAGTGGCACCGAGT  
CGGTGTCTTTTTTTGGATAGAATTTCCAGCTTTTTTG**CGTGTTTCAGCTCTCATGATCCTTG**GCCAATGGGT  
GTAGTAAATTTTCTGCACATTCATTGGATGGAAAATAATGGTTTTAGCTTAGGGAATAAGAAAAGTGAT  
AGGAAGGGGATTTTTGTACAATCACATTTGAATTAGGCTTTGAAATGACAGGGAATGAGGACATATGAT  
GAGACGGTCATTGTTTAGTTCCACCAGATTATATTGAAATTTA**CGTGAGTGTGAGTGAGACTTGATA**  
AGAAAATAAAATCTTTAGTTGGGAAAAAATCAATAATATAAATGGGCTTGAGAAGGAAGCGAGGGATA  
GGCCTTTTCTAAAATAGGCCATTTAAGCTATTAACAATCTTCAAAGTACCACAGCGCTTAGGTAAGA  
AAGCAGCTGAGTTTATATATGGTTAGAGACGAAGTAGTGATTGNNNNNNNNNNNNNNNNNNNN**GTTTT**  
**AGAGCTAGAAATAGCAAGTTAAAATAAGGCTAGTCCGTTATCAACTTGAAAAAGTGGCACCGAGTCCGGTGC**  
TTTTTTTTGCAAAATTTCCAGATCGATTTCTTCTTCTGTTCTTCCGGCGTTCAATTTCTGGGGTTTTCTCTT  
CGTTTTCTGTAACCTGAAACCTAAAATTTGACCTAAAAAAAATCTCAAATAATATGATTCAGTGGTTTTGACTT  
TTCAGTTAGTTGAGTTTGCAGTCCGATGAGATAAACCAATA

### Notes:

- Underlined letters come from binary vectors, while the others come from PCR fragments.
- Red letters indicate primer sites.
- Primer sequences are as follows:

#### Colony PCR primers (5'→3')

U6-29p-F: TTAATCCAACTACTGCAGCCTGAC  
U6-1p-R: TATGCAAGTCTCACTCACACTCAG  
(U6-29p-F + U6-1p-R = 659 bp)

#### Sequencing primers (5'→3')

U6-29p-F: TTAATCCAACTACTGCAGCCTGAC  
U6-29p-R: AGCCCTCTTTTCGATCCATCAAC  
U6-29t-F: CGTGTTTCAGCTCTCATGATCCTTG

## Sequence of four gRNA expression cassettes for dicots

DT1-T4-PCR + pHSN401 et al.

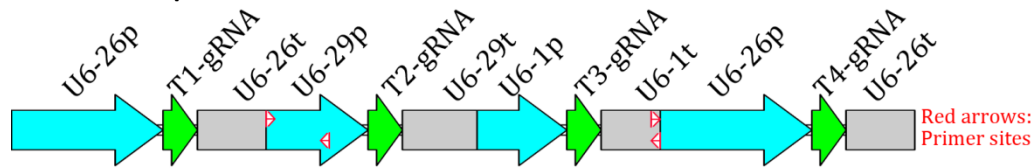

(U6-26p)-(Target-1)-(gRNA-Sc)-(U6-26t)-(U6-29p)-(Target-2)-(gRNA-Sc)-(U6-29t)-  
(U6-1p)-(Target-3)-(gRNA-Sc)-(U6-1t)-(U6-26p)-(Target-4)-(gRNA-Sc)-(U6-26t)

```

CGACTTGCCTCCGCACAATACATCATTTCTTCTAGCTTTTTCTTCTTCTTCTCGTTCATACAGTTTTTTTTTGTTTATCAGCTTAC
ATTTCTTGAACCGTAGCTTTCGTTTTCTTTTTTAACCTCCAGGAGTTTTTGATCTTGTTCATAGTTTGCCAGGATTA
GAATGATTAGGCATCGAACCTCAAGAATTTGATTGAATAAACATCTTCAATCTTAAGATATGAAGATAATCTTCAAAAAGGCCCC
TGGGAATCTGAAAAGAAGAGAAGCAGGCCATTATATGGGAAAAGAACAAATAGTATTTCTTATATAGGCCATTAAAGTTGAAAAC
AATCTTCAAAAAGTCCACATCGCTTAGATAAGAAAACGAAGCTGAGTTTATATACAGCTAGAGTGAAGTAGTGATTTGNNNNNNN
NNNNNNNNNNNNNNNNNNNNNNNNNNNNNNNNNNNNNNNNNNNNNNNNNNNNNNNNNNNNNNNNNNNNNNNNNNNNNNNNNNNN
GTTTTAGAGCTAGAAATAGCAAGTTAAATAAGGCTAGTCCGTTATCAACTTGAAAAAGTGGCACCGAGTCGGTGC
TCGGTGC TTTTTTTGCAAAATTTCCAGATCGATTTCTTCTCCTGTCTTCCGCGTTCAATTTCTGGGGTTTTCTCTCGTTT
TCTGTAACCTGAAACCTAAAATTTGACCTAAAAAAAATCTCAAATAATATGATTCAGTGTTTTGTACTTTTCAGTTAGTTGAGTTT
GCAGTTCGGATGAGATAAACCAATATAATCCAAACTACTGCAGCCTGACCAGACAAATGAGGATGCAAAACAATTTTAAAGTTT
ATCTAACGCTAGCTGTTTTGTTTCTTCTCTCTGTTGCACCAACGACGGCGTTTTCTCAATCATAAAGAGGCTGTTTTACTTAA
GGCCAATAATGTTGATGGATCGAAGAAGAGGGCTTTAATAAACGAGCCGTTAAGCTGTAACGATGTCAAAAACATC
CCACATCGTTCAGTTGAAATAGAAGCTGTTTATATATTGGTAGAGTCTGACTAAGAGATTGNNNNNNNNNNNNNNNNNNNN
NNGTTTTAGAGCTAGAAATAGCAAGTTAAATAAGGCTAGTCCGTTATCAACTTGAAAAAGTGGCACCGAGTCGGTGCTTTTTTT
TGGATAGAATTTCCGACTTTTTTTCGGTGTTCAGCTCTCATGATCCTTGGCCAATGGGTGTAGTAAATTTCTGCACATTCAT
TGGATGGAAAATAATGGTTTTAGCTTTAGGGAATAAGAAAAGTATAGGAAGGGGATTTTTGTACAATCACATTTGAATTA
GGTCTTTGAAATGACAGGGAATGAGGACATATGATGAGACGGTCAATGTTTTAGTTCCACCACGATTATATTTGAAATTTACG
TGAGTGTGAGTGAGACTTGCATAAGAAAATAAAATCTTAGTTGGGAAAAAATCAATAATATAAATGGGCTTGAGAAGGA
AGCGAGGGATAGGCCTTTTTCTAAAATAGGCCATTAAGCTATTAAACATCTTCAAAGTACCACAGCGCTTAGGTAAGA
AAGCAGCTGAGTTTATATGGTTAGAGACGAAGTAGTGATTGNNNNNNNNNNNNNNNNNNNNNNNNNNNNNNGTTTTAGAGCTA
AGCAAGTTAAATAAGGCTAGTCCGTTATCAACTTGAAAAAGTGGCACCGAGTCGGTGCTTTTTTTTTGGCAAAATTTTCAGAT
TTTTTCTTCATCTGTAGATTTCTGGGTTTTTTTTTCGTTTTCTGTAATCATAAGTGAAGTTTTGGATGCAAAATCTGCGCGAAAA
AAGTTGGACCTGCAATGAGCTTATTTAGATAGCTAAGACAAAGTGATTGGTCCGTTCGACTTGCCTCCGCACAATACATCAT
TTCTTCTAGCTTTTTTCTTCTTCTCGTTTCATACAGTTTTTTTTTGTTTATCAGCTTACATTTCTTGAACCGTAGCTTTCGTTTTC
TTCTTTTAACTTTCCATTCGGAGTTTTGTATCTTGTTTCATAGTTTGCCAGGATTAGAATGATTAGGCATCGAACCTTCAAGA
ATTTGATTGAATAAACATCTTCAATCTTAAGATATGAAGATAATCTTCAAAAAGGCCCTGGGAATCGAAAAGAAGAGAAGCAGG
CCCATTATATGGGAAAAGAACAATAGTATTTCTTATATAGGCCATTAAAGTTGAAAACAATCTTCAAAGTCCACATCGCTTAGA
TAAGAAAACGAAGCTGAGTTTATATACAGCTAGAGTGAAGTAGTGATTGNNNNNNNNNNNNNNNNNNNNNNNNNNNNNNGTTTTAGAGCTA
GAAATAGCAAGTTAAATAAGGCTAGTCCGTTATCAACTTGAAAAAGTGGCACCGAGTCGGTGCTTTTTTTTTGGCAAAATTTCCA
GATCGATTTCTTCTTCTTCTCGGCGTTCAATTTCTGGGGTTTTCTTCTCGTTTTCTGTAACCTGAAACCTAAAATTTGACCT
AAAAAAAATCTCAAATAATATGATTCAGTGTTTTGTACTTTTCAGTTAGTTGAGTTTTGCAGTTCGGATGAGATAAACCAATA
  
```

### Notes:

- Underlined letters come from binary vectors, while the others come from PCR fragments.
- Red letters indicate primer sites.
- Primer sequences are as follows:

**Colony PCR primers (5'→3'):**  
 U6-29p-F: TTAATCCAAACTACTGCAGCCTGAC  
 U6-1t-R: AACGGACCAATCACTTTGTCTTAGC  
 (U6-29p-F + U6-1t-R = 1.1 kb)

**Sequencing primers (5'→3'):**  
 U6-29p-F: TTAATCCAAACTACTGCAGCCTGAC  
 U6-29p-R: AGCCCTTTCTTTCGATCCATCAAC  
 U6-1t-F: GCTAAGACAAAGTGATTGGTCCGTT  
 U6-1t-R: AACGGACCAATCACTTTGTCTTAGC

## Sequence of MT1T2-PCR0 with Targets 1 and 2 for monocots

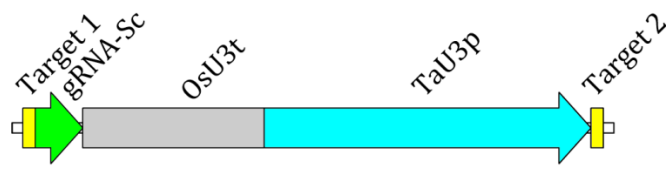

(Target-1)-(gRNA-Sc)-(OsU3t)-(TaU3p)-(Target-2)

ATATATGGTCTCTGGCGNNNNNNNNNNNNNNNNNNNNGTTTTAGAGCTAGAAATAGCAAGTTAAAATAAG  
GCTAGTCCGTTATCAACTTGAAAAAGTGGCACCGAGTCGGTGCCTTTTTTTTTTCGTTTTGCATTGAGTTTTCT  
CCGTGCATGTTTGCAGTTTTATTTCCGTTTGCATTGAAATTTCTCCGTCTCATGTTTGCAGCGTGTCAAAA  
AAGTACGCAGCTGTATTTCACTTATTTACGGCGCCACATTTTCATGCCGTTTGTGCCAACTATCCCGAGCTAGT  
GAATACAGCTTGGCTTACACAACACTGGTGACCCGCTGACCTGCTCGTACCTCGTACCGTCTGACGGCACA  
GCATTTGGAATTAAGGGTGTGATCGATACTGCTTGCTGCTCATGAATCCAACCACACGGAGTTCAAATTCC  
CACAGATTAAGGCTCGTCCGTCGCACAAGGTAATGTGTGAATATTATATCTGTCGTGCAAATTCCTGGCCT  
GCACAATTGCTGTATAGTTGGCGGCAGGGAGAGTTTTAACATTGACTAGCGTGTGATAATTTGTGAGAAA  
TAATAATTGACAAGTAGATACTGACATTTGAGAAGAGCTTCTGAAGTGTATTAGTAACAAAAATGGAAAGCT  
GATGCACGAAAAAGGAAAAAGCCATACTTTTTTTAGGTAGGAAAAAGAAAAAGCCATACGAGACT  
GATGTCTCTCAGATGGCCGGGATCTGTCTATCTAGCAGGCAGCAGCCCAACCTCACGGGCCAGCAATT  
ACGAGTCCTTCTAAAAGCTCCCGCCGAGGGCGCTGGCGTGTGTGCAGCAGCACGTCTAACATTAGTCC  
CACCTCGCCAGTTTACAGGGAGCAGAACCAGCTTATAAGCGGAGGCGCGGCACCAAGAAGCGNNNNNNNN  
NNNNNNNNNNNNGTT

### Primers:

MT1-BsF: ATATATGGTCTCTGGCGNNNNNNNNNNNNNNNNNNNNGTT  
MT1-F0: TNNNNNNNNNNNNNNNNNNNNGTTTTAGAGCTAGAAATAGC  
MT2-R: AACNNNNNNNNNNNNNNNNNNNCGCTTCTTGGTGCC

**Template:** pCBC-MT1T2

**Length:** 950-bp

### Notes:

1. The 19-nt N in primers represent any 19-nt target sequence (forward primers) or reverse complement sequence of any 19-nt target sequence (reverse primers) in front of PAM (NGG).
2. For the assembly of more than two gRNA expression cassettes, use MT1-BsF/MT1-F0/MT2-R three-primer mixture with MT1-F0 primers diluted to 20 times of MT1-BsF or MT2-R, resulting in MT1T2-PCR0.

## Sequence of MT2T3-PCR/PCRO with Targets 2 and 3 for monocots

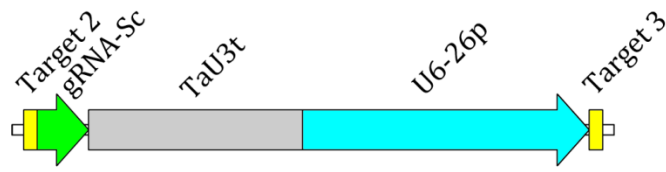

(Target-2)-(gRNA-Sc)-(TaU3t)-(U6-26p)-(Target-3)

```

GGCACCAAGAAGCGNNNNNNNNNNNNNNNNNNNNGTTTTAGAGCTAGAAATAGCAAGTTAAAATAAGGC
TAGTCCGTTATCAACTTGAAAAAGTGGCACCGAGTCGGTGCCTTTTTTTTGTCTTCTGTTTTTTAGTCAGT
CTCTTTTTTTCAGAAGTACAACATCTTTTTTTGTCTTCTGTTTTTTAGTCAGTCTCTTTTTTCAGAAGTACAA
CATCTTTTTTTGTCTTCTGTTTTTTAGTCAGTCTCTTTTTTCAGAAGTACAACATCTTTTTTTGTCTTCTG
TTTTTTAGTCAGTCTCTTTTTTCAGAAGTACTCTATGATGATCGTTCTGGGAAATGCTGTCTGTCTACAACC
CCATAATCTATATTTGCAATCACACATCTAATATTTCTCTGTGACAAGACAGCCGAACACGACTTCCTCCGCA
CAATACATCATTTCTCTTAGCTTTTTTCTTCTCTTCGTTCCATACAGTTTTTTTTGTTTATCAGCTTACATTTT
CTTGAACCGTAGCTTTCGTTTTCTCTTTTAACTTCCATTCGGAGTTTTGTATCTGTTTCATAGTTTGCC
CAGGATTAGAATGATTAGGCATCGAACCTTCAAGAATTTGATTGAATAAAACATCTTCATTCTAAGATATGAA
GATAATCTTCAAAGGCCCTGGGAATCTGAAAGAAGAGAAGCAGGCCCATTTATATGGGAAAACAATA
GTATTTCTTATATAGGCCCATTTAAGTTGAAAACAATCTTCAAAGTCCCACATCGCTTAGATAAGAAAACGAA
GCTGAGTTTATATACAGCTAGAGTCGAAGTAGTGATTGNNNNNNNNNNNNNNNNNNNNGTT
    
```

### Primers:

MT2-F: GGCACCAAGAAGCGNNNNNNNNNNNNNNNNNNNNGTT  
 MT2-F0: TNNNNNNNNNNNNNNNNNNNNGTTTTAGAGCTAGAAATAGC  
 MT3-R0/R: AACNNNNNNNNNNNNNNNNNNNNCAATCACTACTTCGACTCTAGC  
 MT3-BsR: ATTATTGGTCTCTAAACNNNNNNNNNNNNNNNNNNNNC

**Template:** pCBC-MT2T3

**Length:** 887-bp (MT2T3-PCR) or 873-bp (MT2T3-PCRO)

### Notes:

1. The 19-nt N in primers represent any 19-nt target sequence (forward primers) or reverse complement sequence of any 19-nt target sequence (reverse primers) in front of PAM (NGG).
2. For the assembly of three gRNA expression cassettes, use MT2-F/MT2-F0/MT3-R0/MT3-BsR four-primer mixture with MT2-F0/MT3-R0 diluted to 20 times of MT2-F or MT3-BsR, resulting in MT2T3-PCR.
3. For the assembly of more than three gRNA expression cassettes, use MT2-F/MT2-F0/MT3-R three-primer mixture with MT2-F0 diluted to 20 times of MT2-F or MT3-R, resulting in MT2T3-PCRO.

**Sequence of MT3T4-PCR with Targets 3 and 4 for monocots**

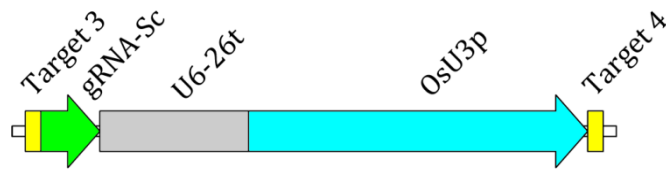

(Target-3)-(gRNA-Sc)-(U6-26t)-(OsU3p)-(Target-4)  
 GCTAGAGTCGAAGTAGTGATTGNNNNNNNNNNNNNNNNNNNNGTTTTAGAGCTAGAAATAGCAAGTTAA  
 AATAAGGCTAGTCCGTATCAACTGAAAAAGTGGCACCAGTCCGGTCTTTTTTGGCAAATTTCCAGAT  
 CGATTTCTTCTTCTCTGTTCTTCGGCGTTCAATTTCTGGGGTTTTCTCTTCGTTTTCTGTAACGAAACCTAAA  
 ATTTGACCTAAAAAATCTCAAATAATATGATTCAGTGGTTTTGTACTTTTCAGTTAGTTGAGTTTTGCAGTT  
 CCGATGAGATAAACCAATAAGTAATTCATCCAGGTACCAAGTTCTAGGATTTTCAGAAGTCAACTTATTTTA  
 TCAAGGAATCTTTAAACATACGAACAGATCACTTAAAGTTCTTCTGAAGCAACTTAAAGTTATCAGGCATGCA  
 TGGATCTTGGAGGAATCAGATGTGCAGTCAGGGACCATAGCACAAGACAGGCGTCTTCTACTGGTGTACTACC  
 AGCAAATGCTGGAAGCCGGAACTGGGTACGTTGGAACCACGTGATGTGAAGAAGTAAGATAAACTGT  
 AGGAGAAAAGCATTTCGTAGTGGGCCATGAAGCCTTCAGGACATGATTGCAGTATGGCCGGCCATTAC  
 GCAATTGGACGACAACAAGACTAGTATTAGTACCACCTCGGCTATCCATAGATCAAAGCTGATTTAAAAG  
 AGTTGTGCAGATGATCCGTGGCGNNNNNNNNNNNNNNNNNNNNGTTTCGAGACCAATAAT

**Primers:**

MT3-F: GCTAGAGTCGAAGTAGTGATTGNNNNNNNNNNNNNNNNNNNNGTT  
 MT3-F0: TGNNNNNNNNNNNNNNNNNNNNGTTTTAGAGCTAGAAATAGC  
 MT4-R0: AACNNNNNNNNNNNNNNNNNNNNCGCCACGGATCATCTGCACAAC 3'  
 MT4-BsR: ATTATTGGTCTCTAAACNNNNNNNNNNNNNNNNNNNNC

**Template:** pCBC-MT3T4

**Length:** 783-bp

**Notes:**

1. The 19-nt N in primers represent any 19-nt target sequence (forward primers) or reverse complement sequence of any 19-nt target sequence (reverse primers) in front of PAM (NGG).
2. For the assembly of four gRNA expression cassettes, use MT3-F/MT3-F0/MT4-R0/MT4-BsR four-primer mixture with MT3-F0/MT4-R0 diluted to 20 times of MT3-F or MT4-BsR.
3. The *Bsa*I site on OsU3p has been mutated to prevent PCR products from being digested on undesirable site.

**Sequence of MT1-T3-PCR with Targets 1, 2 and 3 for monocots**

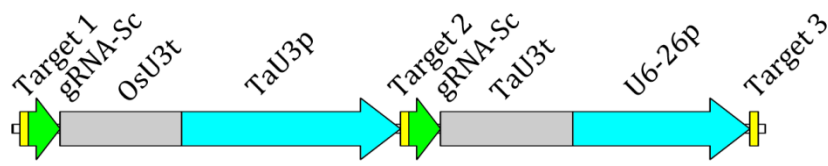

(Target-1)-(gRNA-Sc)-(OsU3t)-(TaU3p)-(Target-2)-(gRNA-Sc)-(TaU3t)-(U6-26p)-(Target-3)

```

GNNNNNNNNNNNNNNNNNNNNNNGTTTTAGAGCTAGAAATAGCAAGTTAAAATAAAGGCTAGTCCGTTATCAA
CTTGAAAAAGTGGCACCGAGTCGGTGCCTTTTTTTTTTCGTTTTGCATTGAGTTTTCTCCGTCGCATGTTTGCA
GTTTTATTTTCCGTTTTGCATTGAAATTTCTCCGTCTCATGTTTGCAGCGTGTTCAAAAGTACGCAGCTGTAT
TTCACTTATTTACGGCGCCACATTTTCATGCCGTTTGCCAACCTATCCCGAGCTAGTGAATACAGCTTGGCTT
CACACAACACTGGTGACCCGCTGACCTGCTCGTACCTCGTACCGTCTGACGGCACAGCATTGGAAATTAAG
GGTGTGATCGATACTGCTTGTCTGCTCATGAATCCAAACCACACGGAGTTCAAATCCCACAGATTAAGGCTC
GTCCGTCGCACAAGGTAATGTTGAATATTATATCTGTCGTGCAAATGCCTGGCCTGCACAATTGCTGTTAT
AGTTGGCGGCAGGGAGAGTTTAAACATTGACTAGCGTGTGATAATTTGTGAGAAATAATAATTGACAAGTA
GATACTGACATTTGAGAAGAGCTTCTGAAGTATTAGTAAACAAAATGGAAAGCTGATGCACGGAAAAAG
GAAAGAAAAAGCCATACTTTTTTTAGGTAGGAAAAGAAAAAGCCATACGAGACTGATGCTCTCAGATGG
GCCGGATCTGTCTATCTAGCAGGCAGCAGCCACCAACCTCACGGGCCAGCAATTACGAGTCCTTCTAAAA
GCTCCCGCCGAGGGGCGCTGGCGCTGCTGTGCAGCAGCACGTCTAACATTAGTCCCACCTCGCCAGTTTAC
AGGGAGCAGAACCAGCTTATAAGCGGAGGCGCGGCACCAAGAAGCGNNNNNNNNNNNNNNNNNNNNNG
TTTTAGAGCTAGAAATAGCAAGTTAAAATAAAGGCTAGTCCGTTATCAAATGAAAAAGTGGCACCGAGTCGG
TGCCTTTTTTTTTGTCCTTCTGTTTTTTTAGTCAGTCTCTTTTTTCAGAAGTACAACATCTTTTTTTGTCCTTCT
GTTTTTTAGTCAGTCTCTTTTTTCAGAAGTACAACATCTTTTTTTGTCCTTCTGTTTTTTTAGTCAGTCTCTT
TTTTTCAGAAGTACAACATCTTTTTTTGTCCTTCTGTTTTTTTAGTCAGTCTCTTTTTTCAGAAGTACTCTATGA
TGATCGTTCTGGGAAATGCTGTCTGTCTACAACCCATAATCTATATTGCAATCACACATCTAATATTCTCTG
TGACAAGACAGCCGAACACGACTTGCCTCCGCACAATACATCATTCTTCTTAGCTTTTTTCTTCTTCTTCTCG
TTCATACAGTTTTTTTTTGTTTATCAGCTTACATTTCTTGAACCGTAGCTTTCGTTTTCTTCTTTAACTTTCC
ATTCGGAGTTTTTTGTATCTGTTTCATAGTTTGTCCAGGATTAGAATGATTAGGCATCGAACCTTCAAGAATT
TGATTGAATAAAAACATCTTATTCTTAAGATATGAAGATAATCTTCAAAGGCCCTGGGAATCTGAAAGAAG
AGAAGCAGGCCATTATATGGGAAAGAACAATAGTATTCTTATATAGGCCATTAAAGTTGAAAACAATCTT
CAAAGTCCCACATCGCTTAGATAAGAAAACGAAGCTGAGTTTATATACAGCTAGAGTCGAAGTAGTGATTG
NNNNNNNNNNNNNNNNNNNNNN
    
```

**Primers:**

MT1-BsF: ATATATGGTCTCTGGC  
 MT3-BsR: ATTATTGGTCTCTAAAC

**Template:**

Gibson Assembly product of the MT1T2-PCR and MT2T3-PCR fragments was used as template for the second round of PCR amplification with MT1-BsF/MT3-BsR primers, resulting in MT1-T3-PCR.

**Length:** 1.8-kb



## Sequence of three gRNA expression cassettes for monocots

MT1-T3-PCR + pBUN411 et al.

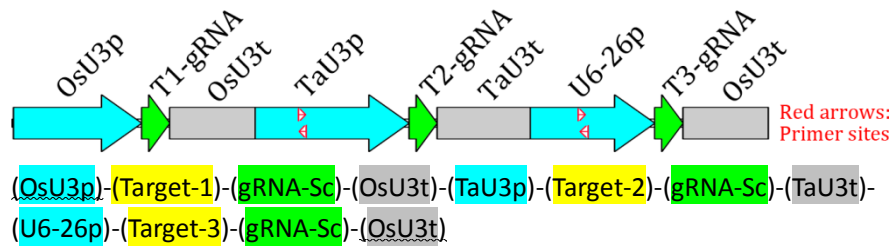

AGTAATTCATCCAGGTCTCCAAGTCTAGGATTTTCAGAACTGCAACTTATTTATCAAGGAATCTTTAAACATACGAACAGATCA  
 CTTAAAGTCTTCTGAAGCAACTTAAAGTTATCAGGCATGCATGGACTTGGAGGAATCAGATGTGCAGTCAGGGACCATAGCA  
 CAAGACAGGCGTCTTACTGCTGCTACCAGCAAATGCTGGAAGCCGGGAACACTGGGTACGTTGGAAACCACGTGATGTGA  
 AGAAGTAAGATAAACTGTAGGAGAAAAGCATTTCGTAGTGGGCCATGAAGCCTTTCAGGACATGTATGCAGTATGGGCCGGC  
 CCATTACGCAATGGACGACAACAAAGACTAGTATTAGTACCACCTCGGCTATCCACATAGATCAAAGCTGATTTAAAGAGTTG  
 TGCAGATGATCCGTGGCGNNNNNNNNNNNNNNNNNNNNGTTTTAGAGCTAGAAATAGCAAGTTAAAATAAGGCTAGTCCGTT  
ATCAACTTGAAAAAGTGGCACCGAGTCGGTGCTTTTTTTTTCGTTTTGCATTGAGTTTTCTCCGTCGCATGTTGCAGTTTTAT  
 TTCCGTTTGCATTGAAATTTCTCCGTCCTCATGTTGCAGCGTGTCAAAGTACGCAGCTGATTTCACTTATTACGGCGCCA  
 CATTTCATGGCTTTGTGCCAACTATCCCGAGCTAGTGAATACAGCTTGGCTTACACAACTGTTGACCGCTGACCTGCTC  
 GTACCTCGTACCGTACGACAGCATTGGAATTAAGGGTGTGATCGATACTGCTTGCTGCTCATGAATCCAAACACAGC  
 GAGTCAAATCCACAGATTAAGGCTCGTCCGTCGCACAAGGAATGTGTAATATTATATCTGCTGCAAAATTGCCTGGCCT  
 GCACAATTGCTGTATAGTTGGCGGCAGGGAGAGTTTTAACATTGACTAGCGTGCTGATAATTTGTGAGAAATAATAATTGACA  
 AGTAGATACTGACATTTGAGAAGAGCTTCTGAACTGTATTAGTAACAAAATGGAAAGCTGATGCACGAAAAAGGAAAGAA  
 AAAGCCATACTTTTTTAGGTAGGAAAAGAAAAGCCATACGAGACTGATGTCTCTCAGATGGGCCGGATCTGTCTATCTAG  
 CAGGCAGCAGCCCAACCTCACGGCCAGCAATTACGAGTCTTCTAAAAGCTCCGCGGAGGGCGCTGGCGCTGCTGT  
 GCAGCAGCAGCTAACATTAGTCCACCTCGCCAGTTTACAGGGAGCAGAACCAGCTTATAAGCGGAGGGCGCGCCACCAAG  
 AAGCGNNNNNNNNNNNNNNNNNNNNGTTTTAGAGCTAGAAATAGCAAGTTAAAATAAGGCTAGTCCGTTATCAACTTGAAAA  
AGTGGCACCGAGTCGGTGCTTTTTTTTTGTCTTCTGTTTTTTAGTCAGTCTCTTTTTTCAGAAGTACAACATCTTTTTTTGTCT  
 CTCTGTTTTTTAGTCAGTCTCTTTTTTCAGAAGTACAACATCTTTTTTTGTCTCTGTTTTTTAGTCAGTCTCTTTTTTCAGA  
 AGTACAACATCTTTTTTTGTCTTCTGTTTTTTAGTCAGTCTCTTTTTTCAGAAGTACTCTATGATGATCGTTCTGGAAATGTC  
 TGCTGTCTACAACCCATACTATATTGCAATCACACATTAATATTCTGTGACAAGACAGCCGAACCGACTTGCCCTCCG  
 CACAATACATCATTCTCTTAGCTTTTTTCTCTCTCTCGTTCATACAGTTTTTTTTTTGTTTATCAGCTACATTTCTGAACCGT  
 AGCTTTCGTTTTCTCTTTTAACTTCCATTCGGAGTTTTTGATCTGTTTTCATAGTTTGTCACAGGATTAGAATGATTAGGCAT  
CGAACCTTCAAGAATTGATTGAATAAAACATCTTCTTCTTAAGATATGAAGATAATCTCAAAGGCCCTGGGAATCTGAAAG  
 AAGAGAAGCAGGCCATTATATGGGAAAGAAACAATAGTATTCTTATATAGGCCATTAAAGTTGAAAAACAATCTCAAAGTC  
 CCACATCGCTTAGATAAGAAAACGAAGCTGAGTTATATACAGCTAGAGTCGAAGTAGTGATTGNNNNNNNNNNNNNNNNNN  
NNGTTTTAGAGCTAGAAATAGCAAGTTAAAATAAGGCTAGTCCGTTATCAACTTGAAAAAGTGGCACCGAGTCGGTGC  
 TTTTTTTCGTTTTGCATTGAGTTTTCTCCGTCGCATGTTGCAGTTTTATTTCCGTTTTGCATTGAAATTTCTCCGTCCTATGTTGCA  
 GCGTGTCAAAGTACGCAGCTGATTTCACTTATTACGGCGCCACATTTTCATGCCGTTTGTGCCAACTATCCCGAGCTAGT  
 GAATACAGCTTGGCTTACACAACTGGTGACCCGCTGACCTGCTCGTACCTCGTACCGTACCGTACGGCACAGCATTGGAAT  
 AAAGGGTGTGATCGATACTGCTTCTGCTGCT

### Notes:

- Underlined letters come from binary vectors, while the others come from PCR fragments.
- Red letters indicate primer sites.
- Primer sequences are as follows:

#### Colony PCR primers (5'→3'):

TaU3p-F2: TTGACTAGCGTGCTGATAATTTGTG

U6-26p-R2: AGGTTTCGATGCCCTAATCATTCTAATCCT

(TaU3p-F2 + U6-26p-R2 = 987 bp)

#### Sequencing primers (5'→3'):

TaU3p-F2: TTGACTAGCGTGCTGATAATTTGTG

TaU3p-R: CTCACAATTATCAGCACGCTAGTC

U6-26p-F: TGTCACAGGATTAGAATGATTAGGC



## Sequence of four gRNA expression cassettes for monocots

MT1-T4-PCR + pBUN411 et al.

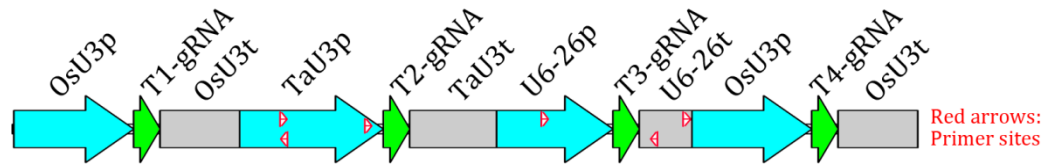

(OsU3p)-(Target-1)-(gRNA-Sc)-(OsU3t)-(TaU3p)-(Target-2)-(gRNA-Sc)-(TaU3t)-  
(U6-26p)-(Target-3)-(gRNA-Sc)-(U6-26t)-(OsU3p)-(Target-4)-(gRNA-Sc)-(OsU3t)-

AGTAATTCATCCAAGTCTCAAGITCTAGGATTTTCAGAAGTCACTTATTTATCAAGGAATCITTAACATACGAACAGATCACTAAAGTCTCTGAA  
GCAACTTAAAGTTATCAGGCATGCATGGATCTTGGAGGAATCAGATGTCAGTCAGGGACCATAGCACAAGACAGGCGCTCTTACTGTTGCTACCAGCA  
AATGCTGGAAGCCGGGAACACTGGGTACGTTGGAAACCAGTGATGTAAGAAGTAAGATAAAGCTAGGAGAAAAGCAITTCGTAGTGGGCCATGAAG  
CCTTTCAGGACATGTAITGCAGTATGGCCGCGCCATTACGCAATTGACGACAACAAAGACTAGTATTAGTACCACCTCGCTATCCACATAGATCAAAGC  
TGATTTAAAGAGTTGTGCAGATGATCCGTGGCGNNNNNNNNNNNNNNNNNNNNGTTTGTAGAGCTAGAATAAGCAAGTTAAATAAAGGCTAGTCCGTTA  
TCAACTTGAAAAGTGGCACCGAGTCGGTGC

Notes:

- Underlined letters come from binary vectors, while the others come from PCR fragments.
- Red letters indicate primer sites.
- Primer sequences are as follows:

| Colony PCR primers (5'→3'):        | Sequencing primers (5'→3'):                |
|------------------------------------|--------------------------------------------|
| TaU3p-F: TTAGTCCCACCTGCCAGTTTACAG  | TaU3p-F2: <u>TTGACTAGCGTGCTGATAATTTGTG</u> |
| U6-26t-R: CCCAGAAATTGAACGCCGAAGAAC | TaU3p-R: <u>CTCACAAATTATCAGCACGCTAGTC</u>  |
| (TaU3p-F + U6-26t-R = 1.2 kb)      | U6-26p-F: TGTCCCAGGATTAGAATGATTAGGC        |
|                                    | U6-26t-F2: GAGTTTTGCAGTTCGGATGAGATAAACC    |
